# Supplementary material for: Modeling soil organic carbon dynamics in temperate forests with Yasso07
Source: Copernicus journal article supplement (doi:10.5194/bg-16-1955-2019), 2019-05-13
Supplement: Supplementary file 1 [file 20190420_MaoETAL_Yasso07_SupplementaryMaterial-II_Database for the meta-analysis of wood and litter chemical composition.xlsx]

## Sheet: Wood
Included_In_Meta-analysis	Zone	Country	Organ	WoodType	SpeciesName	CommonSpeciesName	Genus	Familly	FunctionalType	Holocellulose	a-cellulose	PentoSans	KlasonLignin	1_NaOH	Hot _Water	EtOH_Benzene	Ether	Ash	HoloSum	AcidHydro	NonSoluble	WaterSoluble	EthanolSoluble	Total	percA	percW	percE	percN	Verif	GenusOfInterest	SpeciesOfInterest
Yes	North-America	USA	Wood	Hardwoods	Acer_macrophyllum	Bigleaf_maple	Acer	Sapindaceae	Broadleaves		46	22	25	18	2	3	0.7	0.5	68	78.1114	25	2	3	108.111	72.2509	1.84994	2.77491	23.1243	100
Yes	North-America	USA	Wood	Hardwoods	Acer_rubrum	Red_maple	Acer	Sapindaceae	Broadleaves	77	47	18	21	16	3	2	0.7	0.4	65	77	21	3	2	103	74.7573	2.91262	1.94175	20.3883	100
Yes	North-America	USA	Wood	Hardwoods	Acer_saccharinum	Silver_maple	Acer	Sapindaceae	Broadleaves		42	19	21	21	4	3	0.6		61	73.5182	21	4	3	101.518	72.4187	3.94018	2.95513	20.6859	100
Yes	North-America	USA	Wood	Hardwoods	Acer_saccharum	Sugar_maple	Acer	Sapindaceae	Broadleaves		45	17	22	15	3	3	0.5	0.2	62	74.1744	22	3	3	102.174	72.5959	2.93616	2.93616	21.5318	100
Yes	North-America	USA	Wood	Hardwoods	Alnus_rubra	Red_alder	Alnus	Betulaceae	Broadleaves	74	44	20	24	16	3	2	0.5	0.3	64	74	24	3	2	103	71.8447	2.91262	1.94175	23.301	100
Yes	North-America	USA	Wood	Hardwoods	Arbutus_menziesii	Pacific_madrone	Arbutus	Ericaceae	Broadleaves		44	23	21	23	5	7	0.4	0.7	67	77.4553	21	5	7	110.455	70.1236	4.52672	6.33741	19.0122	100
Yes	North-America	USA	Wood	Hardwoods	Betula_alleghaniensis	Yellow_birch	Betula	Betulaceae	Broadleaves	73	47	23	21	16	2	2	1.2	0.7	70	73	21	2	2	98	74.4898	2.04082	2.04082	21.4286	100
Yes	North-America	USA	Wood	Hardwoods	Betula_nigra	River_birch	Betula	Betulaceae	Broadleaves		41	23	21	21	4	2	0.5		64	75.4867	21	4	2	102.487	73.6551	3.90294	1.95147	20.4905	100
Yes	North-America	USA	Wood	Hardwoods	Betula_papyrifera	Paper_birch	Betula	Betulaceae	Broadleaves	78	45	23	18	17	2	3	1.4	0.3	68	78	18	2	3	101	77.2277	1.9802	2.9703	17.8218	100
Yes	North-America	USA	Wood	Hardwoods	Carya_cordiformis	Bitternut_hickory	Carya	Juglandaceae	Broadleaves		44	19	25	16	5	4	0.5		63	74.8306	25	5	4	108.831	68.7588	4.5943	3.67544	22.9715	100
Yes	North-America	USA	Wood	Hardwoods	Carya_glabra	Pignut_hickory	Carya	Juglandaceae	Broadleaves	71	49	17	24	17	5	4	0.4	0.8	66	71	24	5	4	104	68.2692	4.80769	3.84615	23.0769	100
Yes	North-America	USA	Wood	Hardwoods	Carya_ovata	Shagbark_hickory	Carya	Juglandaceae	Broadleaves	71	48	18	21	18	5	3	0.4	0.6	66	71	21	5	3	100	71	5	3	21	100
Yes	North-America	USA	Wood	Hardwoods	Carya_pallida	Sand_hickory	Carya	Juglandaceae	Broadleaves	69	50	17	23	18	7	4	0.4	1	67	69	23	7	4	103	66.9903	6.79612	3.8835	22.3301	100
Yes	North-America	USA	Wood	Hardwoods	Carya_tomentosa	Mockernut_hickory	Carya	Juglandaceae	Broadleaves	71	48	18	21	17	5	4	0.4	0.6	66	71	21	5	4	101	70.297	4.9505	3.9604	20.7921	100
Yes	North-America	USA	Wood	Hardwoods	Celtis_laevigata	Sugarberry	Celtis	Ulmaceae	Broadleaves		40	22	21	23	6	3	0.3		62	74.1744	21	6	3	104.174	71.2021	5.75957	2.87979	20.1585	100
Yes	North-America	USA	Wood	Hardwoods	Eucalyptus_gigantea	Eucalyptus	Eucalyptus	Myrtaceae	Broadleaves	72	49	14	22	16	7	4	0.3	0.2	63	72	22	7	4	105	68.5714	6.66667	3.80952	20.9524	100
Yes	North-America	USA	Wood	Hardwoods	Fagus_grandifolia	American_beech	Fagus	Fagaceae	Broadleaves	77	49	20	22	14	2	2	0.8	0.4	69	77	22	2	2	103	74.7573	1.94175	1.94175	21.3592	100	1
Yes	North-America	USA	Wood	Hardwoods	Fraxinus_americana	White_ash	Fraxinus	Oleaceae	Broadleaves		41	15	26	16	7	5	0.5		56	70.2373	26	7	5	108.237	64.892	6.46727	4.61948	24.0213	100
Yes	North-America	USA	Wood	Hardwoods	Fraxinus_pennsylvanica	Green_ash	Fraxinus	Oleaceae	Broadleaves		40	18	26	19	7	5	0.4		58	71.5497	26	7	5	109.55	65.3125	6.38979	4.56414	23.7335	100
Yes	North-America	USA	Wood	Hardwoods	Laguncularia_racemosa	White_mangrove	Laguncularia	Combretaceae	Broadleaves		40	19	23	29	15	6	2.1		59	72.2059	23	15	6	116.206	62.1362	12.9081	5.16325	19.7925	100
Yes	North-America	USA	Wood	Hardwoods	Liquidambar_styracifiua	Sweetgum	Liquidambar	Hamamelidaceae	Broadleaves		46	20	21	15	3	2	0.7	0.3	66	76.7991	21	3	2	102.799	74.7079	2.91831	1.94554	20.4282	100
Yes	North-America	USA	Wood	Hardwoods	Liriodendron_tulipifera	Yellow_poplar	Liriodendron	Magnoliaceae	Broadleaves		45	19	20	17	2	1	0.2	1	64	75.4867	20	2	1	98.4867	76.6466	2.03073	1.01537	20.3073	100
Yes	North-America	USA	Wood	Hardwoods	Lithocarpus_densifiorus	Tanoak	Lithocarpus	Fagaceae	Broadleaves	71	46	20	19	20	5	3	0.4	0.7	66	71	19	5	3	98	72.449	5.10204	3.06122	19.3878	100
Yes	North-America	USA	Wood	Hardwoods	Nyssa_aquatica	Water_tupelo	Nyssa	Cornaceae	Broadleaves		45	16	24	16	4	3	0.6	0.6	61	73.5182	24	4	3	104.518	70.3401	3.82708	2.87031	22.9625	100
Yes	North-America	USA	Wood	Hardwoods	Nyssa_sylvatica	Black_tupelo	Nyssa	Cornaceae	Broadleaves	72	45	17	27	15	3	2	0.4	0.5	62	72	27	3	2	104	69.2308	2.88462	1.92308	25.9615	100
Yes	North-America	USA	Wood	Hardwoods	Populus_alba	White_poplar	Populus	Salicaceae	Broadleaves		52	23	16	20	4	5	0.9		75	82.7047	16	4	5	107.705	76.7884	3.71386	4.64233	14.8554	100
Yes	North-America	USA	Wood	Hardwoods	Populus_deltoides	Eastern_cottonwood	Populus	Salicaceae	Broadleaves		47	18	23	15	2	2	0.8	0.4	65	76.1429	23	2	2	103.143	73.8227	1.93906	1.93906	22.2992	100
Yes	North-America	USA	Wood	Hardwoods	Populus_tremuloides	Quaking_aspen	Populus	Salicaceae	Broadleaves	78	49	19	19	18	3	3	1.2	0.4	68	78	19	3	3	103	75.7282	2.91262	2.91262	18.4466	100
Yes	North-America	USA	Wood	Hardwoods	Populus_trichocarpa	Black_cottonwood	Populus	Salicaceae	Broadleaves		49	19	21	18	3	3	0.7	0.5	68	78.1114	21	3	3	105.111	74.313	2.85411	2.85411	19.9788	100
Yes	North-America	USA	Wood	Hardwoods	Prunus_serotina	Black_cherry	Prunus	Rosaceae	Broadleaves	85	45	20	21	18	4	5	0.9	0.1	65	85	21	4	5	115	73.913	3.47826	4.34783	18.2609	100
Yes	North-America	USA	Wood	Hardwoods	Quercus_alba	White_oak	Quercus	Fagaceae	Broadleaves	67	47	20	27	19	6	3	0.5	0.4	67	67	27	6	3	103	65.0485	5.82524	2.91262	26.2136	100	1
Yes	North-America	USA	Wood	Hardwoods	Quercus_coccinea	Scarlet_oak	Quercus	Fagaceae	Broadleaves	63	46	18	28	20	6	3	0.4		64	63	28	6	3	100	63	6	3	28	100	1
Yes	North-America	USA	Wood	Hardwoods	Quercus_douglasii	Blue_oak	Quercus	Fagaceae	Broadleaves	59	40	22	27	23	11	5	1.4	1.4	62	59	27	11	5	102	57.8431	10.7843	4.90196	26.4706	100	1
Yes	North-America	USA	Wood	Hardwoods	Quercus_falcata	Southern_red_oak	Quercus	Fagaceae	Broadleaves	69	42	20	25	17	6	4	0.3	0.4	62	69	25	6	4	104	66.3462	5.76923	3.84615	24.0385	100	1
Yes	North-America	USA	Wood	Hardwoods	Quercus_kelloggii	California_black_oak	Quercus	Fagaceae	Broadleaves	60	37	23	26	26	10	5	1.5	0.4	60	60	26	10	5	101	59.4059	9.90099	4.9505	25.7426	100	1
Yes	North-America	USA	Wood	Hardwoods	Quercus_lobata	Valley_oak	Quercus	Fagaceae	Broadleaves	70	43	19	19	23	5	7	1	0.9	62	70	19	5	7	101	69.3069	4.9505	6.93069	18.8119	100	1
Yes	North-America	USA	Wood	Hardwoods	Quercus_lyrata	Overcup_oak	Quercus	Fagaceae	Broadleaves		40	18	28	24	9	5	1.2	0.3	58	71.5497	28	9	5	113.55	63.0118	7.92605	4.40336	24.6588	100	1
Yes	North-America	USA	Wood	Hardwoods	Quercus_marilandica	Blackjack_oak	Quercus	Fagaceae	Broadleaves		44	20	26	15	5	4	0.6		64	75.4867	26	5	4	110.487	68.322	4.52543	3.62034	23.5322	100	1
Yes	North-America	USA	Wood	Hardwoods	Quercus_prinus	Chestnut_oak	Quercus	Fagaceae	Broadleaves	76	47	19	24	21	7	5	0.6	0.4	66	76	24	7	5	112	67.8571	6.25	4.46429	21.4286	100	1
Yes	North-America	USA	Wood	Hardwoods	Quercus_rubra	Northern_red_oak	Quercus	Fagaceae	Broadleaves	69	46	22	24	22	6	5	1.2	0.4	68	69	24	6	5	104	66.3462	5.76923	4.80769	23.0769	100	1
Yes	North-America	USA	Wood	Hardwoods	Quercus_stellata	Post_oak	Quercus	Fagaceae	Broadleaves		41	18	24	21	8	4	0.5	1.2	59	72.2059	24	8	4	108.206	66.7301	7.39331	3.69666	22.1799	100	1
Yes	North-America	USA	Wood	Hardwoods	Quercus_velutina	Black_oak	Quercus	Fagaceae	Broadleaves	71	48	20	24	18	6	5	0.2	0.2	68	71	24	6	5	106	66.9811	5.66038	4.71698	22.6415	100	1
Yes	North-America	USA	Wood	Hardwoods	Salix_nigra	Black_willow	Salix	Salicaceae	Broadleaves		46	19	21	19	4	2	0.6		65	76.1429	21	4	2	103.143	73.8227	3.87811	1.93906	20.3601	100
Yes	North-America	USA	Wood	Hardwoods	Tilia_heterophylla	Basswood	Tilia	Tiliaceae	Broadleaves	77	48	17	20	20	2	4	2.1	0.7	65	77	20	2	4	103	74.7573	1.94175	3.8835	19.4175	100
Yes	North-America	USA	Wood	Hardwoods	Ulmus_americana	American_elm	Ulmus	Ulmaceae	Broadleaves	73	50	17	22	16	3	2	0.5	0.4	67	73	22	3	2	100	73	3	2	22	100
Yes	North-America	USA	Wood	Softwoods	Abies_amabilis	Pacific_silver_fir	Abies	Pinaceae	Conifers		44	10	29	11	3	3	0.7	0.4	54	68.925	29	3	3	103.925	66.3219	2.8867	2.8867	27.9047	100	1
Yes	North-America	USA	Wood	Softwoods	Abies_balsamea	Balsam_fir	Abies	Pinaceae	Conifers		42	11	29	11	4	3	1	0.4	53	68.2688	29	4	3	104.269	65.4739	3.83624	2.87718	27.8127	100	1
Yes	North-America	USA	Wood	Softwoods	Abies_concolor	White_fir	Abies	Pinaceae	Conifers	66	49	6	28	13	5	2	0.3	0.4	55	66	28	5	2	101	65.3465	4.9505	1.9802	27.7228	100	1
Yes	North-America	USA	Wood	Softwoods	Abies_lasiocarpa	Subalpine_fir	Abies	Pinaceae	Conifers	67	46	9	29	12	3	3	0.6	0.5	55	67	29	3	3	102	65.6863	2.94118	2.94118	28.4314	100	1
Yes	North-America	USA	Wood	Softwoods	Abies_procera	Noble_fir	Abies	Pinaceae	Conifers	61	43	9	29	10	2	3	0.6	0.4	52	61	29	2	3	95	64.2105	2.10526	3.15789	30.5263	100	1
Yes	North-America	USA	Wood	Softwoods	Chamaecyparis_thyoides	Atlantic_white_cedar	Chamaecyparis	Cupressaceae	Conifers		41	9	33	16	3	6	2.4		50	66.3003	33	3	6	108.3	61.2189	2.77008	5.54015	30.4708	100
Yes	North-America	USA	Wood	Softwoods	Juniperus_deppeana	Alligator_juniper	Juniperus	Cupressaceae	Conifers	57	40	5	34	16	3	7	2.4	0.3	45	57	34	3	7	101	56.4356	2.9703	6.93069	33.6634	100
Yes	North-America	USA	Wood	Softwoods	Larix_laricina	Tamarack	Larix	Pinaceae	Conifers	64	44	8	26	14	7	3	0.9	0.3	52	64	26	7	3	100	64	7	3	26	100	1
Yes	North-America	USA	Wood	Softwoods	Larix_occidentalis	Western_larch	Larix	Pinaceae	Conifers	65	48	9	27	16	6	2	0.8	0.4	57	65	27	6	2	100	65	6	2	27	100	1
Yes	North-America	USA	Wood	Softwoods	Libocedrus_decurrens	Incense_cedar	Libocedrus	Cupressaceae	Conifers	56	37	12	34	9	3	3	0.8	0.3	49	56	34	3	3	96	58.3333	3.125	3.125	35.4167	100
Yes	North-America	USA	Wood	Softwoods	Picea_engelmannii	Engelmann_spruce	Picea	Pinaceae	Conifers	69	45	10	28	11	2	2	1.1	0.2	55	69	28	2	2	101	68.3168	1.9802	1.9802	27.7228	100	1
Yes	North-America	USA	Wood	Softwoods	Picea_glauca	White_spruce	Picea	Pinaceae	Conifers		43	13	29	12	3	2	1.1	0.3	56	70.2373	29	3	2	104.237	67.3821	2.87805	1.9187	27.8211	100	1
Yes	North-America	USA	Wood	Softwoods	Picea_mariana	Black_spruce	Picea	Pinaceae	Conifers		43	12	27	11	3	2	1	0.3	55	69.5812	27	3	2	101.581	68.4981	2.9533	1.96887	26.5797	100	1
Yes	North-America	USA	Wood	Softwoods	Picea_sitchensis	Sitka_spruce	Picea	Pinaceae	Conifers		45	7	27	12	4	4	0.7		52	67.6126	27	4	4	102.613	65.8911	3.89815	3.89815	26.3125	100	1
Yes	North-America	USA	Wood	Softwoods	Pinus_attenuata	Knobcone_pine	Pinus	Pinaceae	Conifers		47	14	27	11	3	1		0.2	61	73.5182	27	3	1	104.518	70.3401	2.87031	0.956771	25.8328	100	1
Yes	North-America	USA	Wood	Softwoods	Pinus_banksiana	Jack_pine	Pinus	Pinaceae	Conifers	66	43	13	27	13	3	5	3	0.3	56	66	27	3	5	101	65.3465	2.9703	4.9505	26.7327	100	1
Yes	North-America	USA	Wood	Softwoods	Pinus_clausa	Sand_pine	Pinus	Pinaceae	Conifers		44	11	27	12	2	3	1	0.4	55	69.5812	27	2	3	101.581	68.4981	1.96887	2.9533	26.5797	100	1
Yes	North-America	USA	Wood	Softwoods	Pinus_contorta	Lodgepole_pine	Pinus	Pinaceae	Conifers	68	45	10	26	13	4	3	1.6	0.3	55	68	26	4	3	101	67.3267	3.9604	2.9703	25.7426	100	1
Yes	North-America	USA	Wood	Softwoods	Pinus_echinata	Shortleaf_pine	Pinus	Pinaceae	Conifers	69	45	12	28	12	2	4	2.9	0.4	57	69	28	2	4	103	66.9903	1.94175	3.8835	27.1845	100	1
Yes	North-America	USA	Wood	Softwoods	Pinus_elliottii	Slash_pine	Pinus	Pinaceae	Conifers	64	46	11	27	13	3	4	3.3	0.2	57	64	27	3	4	98	65.3061	3.06122	4.08163	27.551	100	1
Yes	North-America	USA	Wood	Softwoods	Pinus_monticola	Western_white_pine	Pinus	Pinaceae	Conifers	69	43	9	25	13	4	4	2.3	0.2	52	69	25	4	4	102	67.6471	3.92157	3.92157	24.5098	100	1
Yes	North-America	USA	Wood	Softwoods	Pinus_palustris	Longleaf_pine	Pinus	Pinaceae	Conifers		44	12	30	12	3	4	1.4		56	70.2373	30	3	4	107.237	65.4971	2.79753	3.73004	27.9753	100	1
Yes	North-America	USA	Wood	Softwoods	Pinus_ponderosa	Ponderosa_pine	Pinus	Pinaceae	Conifers	68	41	9	26	16	4	5	5.5	0.5	50	68	26	4	5	103	66.0194	3.8835	4.85437	25.2427	100	1
Yes	North-America	USA	Wood	Softwoods	Pinus_resinosa	Red_pine	Pinus	Pinaceae	Conifers	71	47	10	26	13	4	4	2.5		57	71	26	4	4	105	67.619	3.80952	3.80952	24.7619	100	1
Yes	North-America	USA	Wood	Softwoods	Pinus_sabiniana	Digger_pine	Pinus	Pinaceae	Conifers		46	11	27	12	3	1		0.2	57	70.8935	27	3	1	101.894	69.5761	2.94425	0.981417	26.4983	100	1
Yes	North-America	USA	Wood	Softwoods	Pinus_strobes	Eastern_white_pine	Pinus	Pinaceae	Conifers	68	45	8	27	15	4	6	3.2	0.2	53	68	27	4	6	105	64.7619	3.80952	5.71429	25.7143	100	1
Yes	North-America	USA	Wood	Softwoods	Pinus_taeda	Loblolly_pine	Pinus	Pinaceae	Conifers	68	45	12	27	11	2	3	2		57	68	27	2	3	100	68	2	3	27	100	1
Yes	North-America	USA	Wood	Softwoods	Pseudotsuga_menziesii	Douglas_fir	Pseudotsuga	Pinaceae	Conifers	66	45	8	27	13	4	4	1.3	0.2	53	66	27	4	4	101	65.3465	3.9604	3.9604	26.7327	100	1	1
Yes	North-America	USA	Wood	Softwoods	Sequoia_sempervirens	Redwood_old_growth	Sequoia	Cupressaceae	Conifers	55	43	7	33	19	9	10	0.8	0.1	50	55	33	9	10	107	51.4019	8.41121	9.34579	30.8411	100
Yes	North-America	USA	Wood	Softwoods	Taxodium_distichum	Bald_cypress	Taxodium	Cupressaceae	Conifers		41	12	33	13	4	5	1.5		53	68.2688	33	4	5	110.269	61.9113	3.6275	4.53437	29.9269	100
Yes	North-America	USA	Wood	Softwoods	Thuja_occidentalis	Northern_white_cedar	Thuja	Cupressaceae	Conifers	59	44	14	30	13	5	6	1.4	0.5	58	59	30	5	6	100	59	5	6	30	100
Yes	North-America	USA	Wood	Softwoods	Thuja_plicata	Western_red_cedar	Thuja	Cupressaceae	Conifers		38	9	32	21	11	14	2.5	0.3	47	64.3318	32	11	14	121.332	53.0214	9.06605	11.5386	26.374	100
Yes	North-America	USA	Wood	Softwoods	Tsuga_canadensis	Eastern_hemlock	Tsuga	Pinaceae	Conifers		41	9	33	13	4	3	0.5	0.5	50	66.3003	33	4	3	106.3	62.3708	3.76292	2.82219	31.0441	100
Yes	North-America	USA	Wood	Softwoods	Tsuga_heterophylla	Western_hemlock	Tsuga	Pinaceae	Conifers	67	42	9	29	14	4	4	0.5	0.4	51	67	29	4	4	104	64.4231	3.84615	3.84615	27.8846	100
Yes	North-America	USA	Wood	Softwoods	Tsuga_mertensiana	Mountain_hemlock	Tsuga	Pinaceae	Conifers	60	43	7	27	12	5	5	0.9	0.5	50	60	27	5	5	97	61.8557	5.15464	5.15464	27.8351	100
No	Central-America	Brazil	Wood	Unspecified	Brosimum_parinarioides	Amapa_roxo	Brosimum	Moraceae	Broadleaves		51	10	26	21	2	6		0.2	61	73.5182	26	2	6	107.518	68.3775	1.86015	5.58045	24.1819	100
No	Central-America	Brazil	Wood	Unspecified	Cecropia_juranyiana	Imbaubad	Cecropia	Urticaceae	Broadleaves	69	48	17	25	14	6	3	0.3	0.7	65	69	25	6	3	103	66.9903	5.82524	2.91262	24.2718	100
No	Central-America	Brazil	Wood	Unspecified	Corythophora_alta	Ripeiro_vermelho	Corythophora	Lecythidaceae	Broadleaves		47	10	30	19	6	4		0.5	57	70.8935	30	6	4	110.894	63.9294	5.4106	3.60706	27.053	100
No	Central-America	Brazil	Wood	Unspecified	Couepia_leptostachya	Uchi_de_cutia	Couepia	Chrysobalanaceae	Broadleaves		39	9	33	12	4	0.5		0.8	48	64.988	33	4	0.5	102.488	63.4103	3.9029	0.487862	32.1989	100
No	Central-America	Brazil	Wood	Unspecified	Eclinusa_ucuquiranabranca	Ucuquirana_brava	Eclinusa	Sapotaceae	Broadleaves		55	15	30	17	4	1		0.6	70	79.4238	30	4	1	114.424	69.412	3.49578	0.873944	26.2183	100
No	Central-America	Brazil	Wood	Unspecified	Eperua_bijuga	Muirapiranga	Eperua	Fabaceae	Broadleaves		41	12	38	31	11	9		0.2	53	68.2688	38	11	9	126.269	54.0663	8.71157	7.12765	30.0945	100
No	Central-America	Brazil	Wood	Unspecified	Eschweiler_odora	Matamata	Eschweiler	Lecythidaceae	Broadleaves		50	13	32	18	6	0.5		0.9	63	74.8306	32	6	0.5	113.331	66.0286	5.29425	0.441187	28.236	100
No	Central-America	Brazil	Wood	Unspecified	Eucalyptus_camaldulensis	Red_river_gum	Eucalyptus	Myrtaceae	Broadleaves		50	17	29	11	2	2		0.8	67	77.4553	29	2	2	110.455	70.1236	1.81069	1.81069	26.255	100
No	Central-America	Brazil	Wood	Unspecified	Eucalyptus_cloeziana	Gympie_messmate_	Eucalyptus	Myrtaceae	Broadleaves		54	16	28	12	2	3		0.3	70	79.4238	28	2	3	112.424	70.6468	1.77898	2.66847	24.9058	100
No	Central-America	Brazil	Wood	Unspecified	Eucalyptus_grandis	Flooded_gum_	Eucalyptus	Myrtaceae	Broadleaves		54	19	26	16	3	3		0.3	73	81.3923	26	3	3	113.392	71.7794	2.64568	2.64568	22.9292	100
No	Central-America	Brazil	Wood	Unspecified	Eucalyptus_kirtoniana	_	Eucalyptus	Myrtaceae	Broadleaves	74	50	15	28	14	3	2	0.3	0.1	65	74	28	3	2	107	69.1589	2.80374	1.86916	26.1682	100
No	Central-America	Brazil	Wood	Unspecified	Eucalyptus_saligna	Sydney_blue_gum	Eucalyptus	Myrtaceae	Broadleaves	74	50	15	27	14	3	1	0.3	0.2	65	74	27	3	1	105	70.4762	2.85714	0.952381	25.7143	100
No	Central-America	Brazil	Wood	Unspecified	Eucalyptus_tesselaris	_	Eucalyptus	Myrtaceae	Broadleaves		50	21	24	17	5	2		0.6	71	80.08	24	5	2	111.08	72.0922	4.50126	1.8005	21.6061	100
No	Central-America	Brazil	Wood	Unspecified	Eucalyptus_torelliana	Cadaga	Eucalyptus	Myrtaceae	Broadleaves		53	23	22	19	3	2		1	76	83.3608	22	3	2	110.361	75.5348	2.71836	1.81224	19.9346	100
No	Central-America	Brazil	Wood	Unspecified	Eucalyptus_urophylla	Timor_white_gum	Eucalyptus	Myrtaceae	Broadleaves		53	19	24	17	2	2		0.4	72	80.7361	24	2	2	108.736	74.2496	1.83932	1.83932	22.0718	100
No	Central-America	Brazil	Wood	Unspecified	Holopyxidium_latifolium	Jarana	Holopyxidium	Lecythidaceae	Broadleaves		50	10	30	17	1	4		0.3	60	72.862	30	1	4	107.862	67.5511	0.92711	3.70844	27.8133	100
No	Central-America	Brazil	Wood	Unspecified	Licania_oblonifolia	Macuco_chiador	Licania	Chrysobalanaceae	Broadleaves		51	20	33	18	2	1		0.5	71	80.08	33	2	1	116.08	68.9869	1.72295	0.861475	28.4287	100
No	Central-America	Brazil	Wood	Unspecified	Lucuma_dissepala	Abiurana	Lucuma	Sapotaceae	Broadleaves	74	48	17	25	14	2	2	0.5	1	65	74	25	2	2	103	71.8447	1.94175	1.94175	24.2718	100
No	Central-America	Brazil	Wood	Unspecified	Micropholis_rosadinhabrava	Rosada_brava	Micropholis	Sapotaceae	Broadleaves		53	11	28	13	2	1		0.8	64	75.4867	28	2	1	106.487	70.8884	1.87817	0.939084	26.2944	100
No	Central-America	Brazil	Wood	Unspecified	Pouteria_guianensis	Abiurana_Abiu	Pouteria	Sapotaceae	Broadleaves		54	7	30	13	3	2		0.3	61	73.5182	30	3	2	108.518	67.7473	2.76451	1.84301	27.6451	100
No	Central-America	Brazil	Wood	Unspecified	Protium_heptaphyllum	Breu_branco	Protium	Burseraceae	Broadleaves	70	49	17	27	16	5	2	0.4	0.6	66	70	27	5	2	104	67.3077	4.80769	1.92308	25.9615	100
No	Central-America	Brazil	Wood	Unspecified	Qualea_dinizii	Pau_mulato	Qualea	Vochysiaceae	Broadleaves	69	48	14	28	15	3	2	0.3	0.8	62	69	28	3	2	102	67.6471	2.94118	1.96078	27.451	100
No	Central-America	Brazil	Wood	Unspecified	Schizolobium_amazonicum	Parica	Schizolobium	Fabaceae	Broadleaves		54	12	26	16	2	2		0.8	66	76.7991	26	2	2	106.799	71.9099	1.87268	1.87268	24.3448	100
No	Central-America	Brazil	Wood	Unspecified	Vantanea_parviflora	Macucu_murici	Vantanea	Humiriaceae	Broadleaves		51	10	37	14	4	2		0.2	61	73.5182	37	4	2	116.518	63.0959	3.43294	1.71647	31.7547	100
No	Central-America	Brazil	Wood	Unspecified	Eucryphia_cordifolia	Ulmo	Eucryphia	Cunoniaceae	Broadleaves	77	49	15	26	17	3	2	0.3	0.5	64	77	26	3	2	108	71.2963	2.77778	1.85185	24.0741	100
No	Central-America	Brazil	Wood	Unspecified	Laurelia_philippiana	Tepa	Laurelia	Atherospermataceae	Broadleaves	71	46	16	28	10	2	2	0.4	1	62	71	28	2	2	103	68.932	1.94175	1.94175	27.1845	100
No	Central-America	Brazil	Wood	Unspecified	Nothofagus_dombeyi	Coigue	Nothofagus	Fagaceae	Broadleaves	70	48	17	23	19	7	6	1	0.3	65	70	23	7	6	106	66.0377	6.60377	5.66038	21.6981	100
No	Central-America	Columbia	Wood	Unspecified	Anacardium_excelsum	Caracoli	Anacardium	Anacardiaceae	Broadleaves	61	44	10	30	18	6	6	2.9	1.2	54	61	30	6	6	103	59.2233	5.82524	5.82524	29.1262	100
No	Central-America	Columbia	Wood	Unspecified	Ceiba_pentandra	Ceiba_hruja	Ceiba	Malvaceae	Broadleaves	62	41	16	25	25	15	2	0.5	2.9	57	62	25	15	2	104	59.6154	14.4231	1.92308	24.0385	100
No	Central-America	Columbia	Wood	Unspecified	Shizolobium_parahybum	Camombo	Shizolobium	Fabaceae	Broadleaves	73	49	14	26	21	2	2	0.5	0.4	63	73	26	2	2	103	70.8738	1.94175	1.94175	25.2427	100
No	Central-America	Columbia	Wood	Unspecified	Spondias_purpurea	Jobo	Spondias	Anacardiaceae	Broadleaves	72	47	17	24	17	3	3	0.7	1	64	72	24	3	3	102	70.5882	2.94118	2.94118	23.5294	100
No	Central-America	Costa_Rica	Wood	Unspecified	Anacardium_excelsum	Espavel	Anacardium	Anacardiaceae	Broadleaves	72		8	27	18	7	3		1.6		72	27	7	3	109	66.055	6.42202	2.75229	24.7706	100
No	Central-America	Costa_Rica	Wood	Unspecified	Brosimum_utile	Baco	Brosimum	Moraceae	Broadleaves	79		13	26	16	3	2		0.4		79	26	3	2	110	71.8182	2.72727	1.81818	23.6364	100
No	Central-America	Costa_Rica	Wood	Unspecified	Carapa_slateri	Cedro_macho	Carapa	Meliaceae	Broadleaves	79		11	25	14	4	2		0.6		79	25	4	2	110	71.8182	3.63636	1.81818	22.7273	100
No	Central-America	Costa_Rica	Wood	Unspecified	Caryocar_costaricense	Ajo	Caryocar	Caryocaraceae	Broadleaves	75		13	24	16	9	3		0.4		75	24	9	3	111	67.5676	8.10811	2.7027	21.6216	100
No	Central-America	Costa_Rica	Wood	Unspecified	Ceiba_pentandra	Ceiba	Ceiba	Malvaceae	Broadleaves	77		10	26	19	7	1		2.7		77	26	7	1	111	69.3694	6.30631	0.900901	23.4234	100
No	Central-America	Costa_Rica	Wood	Unspecified	Couratari_panamensis	Campano	Couratari	Lecythidaceae	Broadleaves	76		11	31	12	5	2		0.7		76	31	5	2	114	66.6667	4.38596	1.75439	27.193	100
No	Central-America	Costa_Rica	Wood	Unspecified	Dialyanthera_otoba	Bogamani	Dialyanthera	Myristicaceae	Broadleaves	81		12	26	14	4	1		0.4		81	26	4	1	112	72.3214	3.57143	0.892857	23.2143	100
No	Central-America	Costa_Rica	Wood	Unspecified	Dussia_sp.	Sangriilo_amarillo	Dussia	Fabaceae	Broadleaves	82		10	28	10	3	1		0.6		82	28	3	1	114	71.9298	2.63158	0.877193	24.5614	100
No	Central-America	Costa_Rica	Wood	Unspecified	Peltogyne_purpurea	Nazareno	Peltogyne	Fabaceae	Broadleaves	81		12	22	13	6	5		0.5		81	22	6	5	114	71.0526	5.26316	4.38596	19.2982	100
No	Central-America	Costa_Rica	Wood	Unspecified	Platymiscium_pinnatum	Cristobal_	Platymiscium	Fabaceae	Broadleaves	76		15	26	15	6	6		0.6		76	26	6	6	114	66.6667	5.26316	5.26316	22.807	100
No	Central-America	Costa_Rica	Wood	Unspecified	Poulsenia_armata	Calugo	Poulsenia	Moraceae	Broadleaves	81		11	36	20	3	1		9.7		81	36	3	1	121	66.9421	2.47934	0.826446	29.7521	100
No	Central-America	Costa_Rica	Wood	Unspecified	Qualea_paraensis	Masicaran	Qualea	Vochysiaceae	Broadleaves	79		11	25	17	5	1		1.3		79	25	5	1	110	71.8182	4.54545	0.909091	22.7273	100
No	Central-America	Costa_Rica	Wood	Unspecified	Sacoglottis_excelsa	Terciopelo	Sacoglottis	Humiriaceae	Broadleaves	76		11	31	19	6	1		0.4		76	31	6	1	114	66.6667	5.26316	0.877193	27.193	100
No	Central-America	Costa_Rica	Wood	Unspecified	Sapotaceae_sp.N	Nispero	Sapotaceae	Sapotaceae	Broadleaves	82		14	25	15	3	1		1.9		82	25	3	1	111	73.8739	2.7027	0.900901	22.5225	100
No	Central-America	Costa_Rica	Wood	Unspecified	Sapotaceae_sp.Z	Zapoton	Sapotaceae	Sapotaceae	Broadleaves	80		15	25	18	5	2		0.7		80	25	5	2	112	71.4286	4.46429	1.78571	22.3214	100
No	Central-America	Costa_Rica	Wood	Unspecified	Symphonia_globulifera	CeriUo	Symphonia	Clusiaceae	Broadleaves	78		15	24	15	3	3		0.4		78	24	3	3	108	72.2222	2.77778	2.77778	22.2222	100
No	Central-America	Costa_Rica	Wood	Unspecified	Terminalia_amazonia	Escobo_amarillo	Terminalia	Combretaceae	Broadleaves	71		12	25	17	10	8		0.5		71	25	10	8	114	62.2807	8.77193	7.01754	21.9298	100
No	Central-America	Costa_Rica	Wood	Unspecified	Uribea_tamarindoides	Almendro	Uribea	Fabaceae	Broadleaves	73		12	33	IO	4	5		1.1		73	33	4	5	115	63.4783	3.47826	4.34783	28.6957	100
No	Central-America	Costa_Rica	Wood	Unspecified	Vantanea_barbourii	Caracolillo	Vantanea	Humiriaceae	Broadleaves	78		11	31	11	3	1		0.4		78	31	3	1	113	69.0265	2.65487	0.884956	27.4336	100
No	Central-America	Costa_Rica	Wood	Unspecified	Virola_sp.	Fruta_dorada	Virola		Broadleaves	80		15	24	17	4	1		0.6		80	24	4	1	109	73.3945	3.66972	0.917431	22.0183	100
No	Central-America	Costa_Rica	Wood	Unspecified	Vochysia_sp.	Mayo_negro	Vochysia		Broadleaves	82		17	22	21	6	4		0.9		82	22	6	4	114	71.9298	5.26316	3.50877	19.2982	100
No	Central-America	Costa_Rica	Wood	Unspecified	Vochysia_allenii	Mayo_blanco	Vochysia		Broadleaves	81		11	22	18	4	3		1.1		81	22	4	3	110	73.6364	3.63636	2.72727	20	100
No	Central-America	Mexico_Yucatan	Wood	Unspecified	Allophylus_psilosp	Kanchunup	Allophylus		Broadleaves	60	46	12	34	12	4	4	0.5	1.2	58	60	34	4	4	102	58.8235	3.92157	3.92157	33.3333	100
No	Central-America	Mexico_Yucatan	Wood	Unspecified	Brosimum_alicastrum	Ramon_	Brosimum		Broadleaves	63	44	16	27	17	5	2	0.4	1.6	60	63	27	5	2	97	64.9485	5.15464	2.06186	27.8351	100
No	Central-America	Mexico_Yucatan	Wood	Unspecified	Bursera_simaruba	Chacha	Bursera		Broadleaves	74	46	17	23	20	5	4	0.8	1.6	63	74	23	5	4	106	69.8113	4.71698	3.77358	21.6981	100
No	Central-America	Mexico_Yucatan	Wood	Unspecified	Calyptranthes_miiispaughii	Chachi	Calyptranthes		Broadleaves	67	47	12	29	15	5	2	0.7	2.7	59	67	29	5	2	103	65.0485	4.85437	1.94175	28.1553	100
No	Central-America	Mexico_Yucatan	Wood	Unspecified	Cecropia_obtusifolia	Kochle	Cecropia		Broadleaves	67	45	15	25	19	5	4	0.7	1.7	60	67	25	5	4	101	66.3366	4.9505	3.9604	24.7525	100
No	Central-America	Mexico_Yucatan	Wood	Unspecified	Ceiba_penta	Ceiba	Ceiba		Broadleaves	64	40	18	22	28	14	2	0.5	2.4	58	64	22	14	2	102	62.7451	13.7255	1.96078	21.5686	100
No	Central-America	Mexico_Yucatan	Wood	Unspecified	Coccoloba_uuifera	Boo	Coccoloba		Broadleaves	69	48	14	28	17	5	2	0.5	1.6	62	69	28	5	2	104	66.3462	4.80769	1.92308	26.9231	100
No	Central-America	Mexico_Yucatan	Wood	Unspecified	Drypetes_lateriflora	Ekulu	Drypetes		Broadleaves	69	48	15	26	17	6	4	0.5	2.5	63	69	26	6	4	105	65.7143	5.71429	3.80952	24.7619	100
No	Central-America	Mexico_Yucatan	Wood	Unspecified	Ficus_lapathifolia	Zacamua	Ficus		Broadleaves	66	44	15	30	17	5	2	0.5	1.7	59	66	30	5	2	103	64.0777	4.85437	1.94175	29.1262	100
No	Central-America	Mexico_Yucatan	Wood	Unspecified	Guazuma_tomentosa	Pixoy	Guazuma		Broadleaves	70	45	16	27	16	2	1	0.5	1.2	61	70	27	2	1	100	70	2	1	27	100
No	Central-America	Mexico_Yucatan	Wood	Unspecified	Pisonia_sp.	Tatsi	Pisonia		Broadleaves	76	58	14	20	11	2	1	0.4	1.5	72	76	20	2	1	99	76.7677	2.0202	1.0101	20.202	100
No	Central-America	Mexico_Yucatan	Wood	Unspecified	Poincianella_guameri	Kitanche	Poincianella		Broadleaves	62	47	14	25	19	10	7	2	1.3	61	62	25	10	7	104	59.6154	9.61538	6.73077	24.0385	100
No	Central-America	Mexico_Yucatan	Wood	Unspecified	Spondias_mombin	Jobo	Spondias		Broadleaves	74	46	18	19	22	6	3	0.7	1.2	64	74	19	6	3	102	72.549	5.88235	2.94118	18.6275	100
No	Central-America	Puerto_Rico	Wood	Unspecified	Cecropia_peltata	Yagrumo_hembra	Cecropia		Broadleaves	68	46	14	25	16	2	3	0.6	0.7	60	68	25	2	3	98	69.3878	2.04082	3.06122	25.5102	100
No	Central-America	Puerto_Rico	Wood	Unspecified	Eucalyptus_robusta	Swamp_mahogany	Eucalyptus		Broadleaves	67	48	12	28	12	3	2	0.3	0.5	60	67	28	3	2	100	67	3	2	28	100
No	Central-America	Puerto_Rico	Wood	Unspecified	Inga_vera	Guama	Inga		Broadleaves	66	50	13	28	11	2	2	0.3	0.2	63	66	28	2	2	98	67.3469	2.04082	2.04082	28.5714	100
Yes	Asia	Japan	Wood	Hardwoods	Acanthopanax_sciadophylloides	Meigetsukaede	Acanthopanax		Broadleaves	80	45	21	21	23	5	2		0.6	66	80	21	5	2	108	74.0741	4.62963	1.85185	19.4444	100
Yes	Asia	Japan	Wood	Hardwoods	Acer_mono	Itayakaede	Acer		Broadleaves	81	48	22	19	17	4	2		0.4	70	81	19	4	2	106	76.4151	3.77358	1.88679	17.9245	100
Yes	Asia	Japan	Wood	Hardwoods	Acer_mono	Yamanomiji	Acer		Broadleaves	78	49	18	24		4	2		0.5	67	78	24	4	2	108	72.2222	3.7037	1.85185	22.2222	100
Yes	Asia	Japan	Wood	Hardwoods	Acer_palmatum	Tochinoki	Acer		Broadleaves	77	42	23	22	24	7	3		0.5	65	77	22	7	3	109	70.6422	6.42202	2.75229	20.1835	100
Yes	Asia	Japan	Wood	Hardwoods	Aesculus_turbinata	Tochinoki	Aesculus		Broadleaves	79	44	22	21	18	5	2		0.3	66	79	21	5	2	107	73.8318	4.6729	1.86916	19.6262	100
Yes	Asia	Japan	Wood	Hardwoods	Aesculus_turbinata	Keyamahannoki	Aesculus		Broadleaves	75	46	14	27		3	1		0.3	60	75	27	3	1	106	70.7547	2.83019	0.943396	25.4717	100
Yes	Asia	Japan	Wood	Hardwoods	Alnus_hirsuta	Keyamahannoki	Alnus		Broadleaves	79	43	20	20	22	5	5		0.3	63	79	20	5	5	109	72.4771	4.58716	4.58716	18.3486	100
Yes	Asia	Japan	Wood	Hardwoods	Alnus_hirsuta	Hannoki	Alnus		Broadleaves	73	48	15	23		4	2		0.3	63	73	23	4	2	102	71.5686	3.92157	1.96078	22.549	100
Yes	Asia	Japan	Wood	Hardwoods	Alnus_ja	Taranoki	Alnus		Broadleaves	76	40	23	22	22	5	4		0.3	63	76	22	5	4	107	71.028	4.6729	3.73832	20.5607	100
Yes	Asia	Japan	Wood	Hardwoods	Aralia_elata	Kuromoji	Aralia		Broadleaves	78	47	26	20	23	7	4		0.4	73	78	20	7	4	109	71.5596	6.42202	3.66972	18.3486	100
Yes	Asia	Japan	Wood	Hardwoods	Benzoin_umbellatum	Mizume	Benzoin		Broadleaves	77	34	27	19	26	7	6		0.8	61	77	19	7	6	109	70.6422	6.42202	5.50459	17.4312	100
Yes	Asia	Japan	Wood	Hardwoods	Betula_grossa	Dakekanha	Betula		Broadleaves	78	46	27	24		2	2		0.4	73	78	24	2	2	106	73.5849	1.88679	1.88679	22.6415	100
Yes	Asia	Japan	Wood	Hardwoods	Betula_ennanii	Udaikanba	Betula		Broadleaves	79	46	25	20	17	2	3		0.3	71	79	20	2	3	104	75.9615	1.92308	2.88462	19.2308	100
Yes	Asia	Japan	Wood	Hardwoods	Retula_maximowicziana	Makanba	Retula		Broadleaves	82	40	26	20	17	2	1		0.2	66	82	20	2	1	105	78.0952	1.90476	0.952381	19.0476	100
Yes	Asia	Japan	Wood	Hardwoods	Betula_maximowicziana	Shirakanba	Betula		Broadleaves	77	47	18	23		2	1		0.4	65	77	23	2	1	103	74.7573	1.94175	0.970874	22.3301	100
Yes	Asia	Japan	Wood	Hardwoods	Betula_platiphylla	Shirakanha	Betula		Broadleaves	83	46	23	19	16	3	1		0.4	69	83	19	3	1	106	78.3019	2.83019	0.943396	17.9245	100
Yes	Asia	Japan	Wood	Hardwoods	Betula_platiphylla	Sawashiba	Betula		Broadleaves	77	56	22	18		2	2		0.2	78	77	18	2	2	99	77.7778	2.0202	2.0202	18.1818	100
Yes	Asia	Japan	Wood	Hardwoods	Carpinus_cordata	Akashide	Carpinus		Broadleaves	79	43	20	21	23	4	2		0.5	63	79	21	4	2	106	74.5283	3.77358	1.88679	19.8113	100
Yes	Asia	Japan	Wood	Hardwoods	Carpinus_laxiflora	Kuri	Carpinus		Broadleaves	80	46	27	17		3	2		0.6	73	80	17	3	2	102	78.4314	2.94118	1.96078	16.6667	100
Yes	Asia	Japan	Wood	Hardwoods	Casianea_crenaia	Kuri	Casianea		Broadleaves	73	40	23	26	23	10	3		0.3	63	73	26	10	3	112	65.1786	8.92857	2.67857	23.2143	100
Yes	Asia	Japan	Wood	Hardwoods	Castanea_crenata	Katsura	Castanea		Broadleaves	70	42	15	21		11	2		0.8	57	70	21	11	2	104	67.3077	10.5769	1.92308	20.1923	100
Yes	Asia	Japan	Wood	Hardwoods	Cercidiphyllum_japonicum	Katsura	Cercidiphyllum		Broadleaves	78	44	23	24	21	6	0.5		0.7	67	78	24	6	0.5	108.5	71.8894	5.52995	0.460829	22.1198	100
Yes	Asia	Japan	Wood	Hardwoods	Cercidiphyllum_japonicum	Kusunuki	Cercidiphyllum		Broadleaves	78	51	16	26		5	3		0.3	67	78	26	5	3	112	69.6429	4.46429	2.67857	23.2143	100
Yes	Asia	Japan	Wood	Hardwoods	Cinnamomum_camphora	Miznki	Cinnamomum		Broadleaves	81	50	14	29		5	2		0.5	64	81	29	5	2	117	69.2308	4.2735	1.7094	24.7863	100
Yes	Asia	Japan	Wood	Hardwoods	Cornus_controversa	Miznki	Cornus		Broadleaves	82	43	23	23	24	5	1		0.3	66	82	23	5	1	111	73.8739	4.5045	0.900901	20.7207	100
Yes	Asia	Japan	Wood	Hardwoods	Cornus_controversa	Akagashi	Cornus		Broadleaves	73	46	17	22		4	2		0.4	63	73	22	4	2	101	72.2772	3.9604	1.9802	21.7822	100
Yes	Asia	Japan	Wood	Hardwoods	Cyclobalanopsis_acuta	Shirakashi	Cyclobalanopsis		Broadleaves	71	47	17	25		9	4		0.7	64	71	25	9	4	109	65.1376	8.25688	3.66972	22.9358	100
Yes	Asia	Japan	Wood	Hardwoods	Cyclobalanopsis_myrsinaefolia	Ichiigashi	Cyclobalanopsis		Broadleaves	75	48	19	23		7	2		1	67	75	23	7	2	107	70.0935	6.54206	1.86916	21.4953	100
Yes	Asia	Japan	Wood	Hardwoods	Cyclobalanopsis_gilva	Isunoki	Cyclobalanopsis		Broadleaves	77	48	15	27		6	1		1.1	63	77	27	6	1	111	69.3694	5.40541	0.900901	24.3243	100
Yes	Asia	Japan	Wood	Hardwoods	Distylium_racemosum	Hirobat_Suribana	Distylium		Broadleaves	73	47	17	30		5	2		0.5	64	73	30	5	2	110	66.3636	4.54545	1.81818	27.2727	100
Yes	Asia	Japan	Wood	Hardwoods	Euonymus_macropterus	Tsuribana	Euonymus		Broadleaves	71	33	26	27	21	7	4		0.9	59	71	27	7	4	109	65.1376	6.42202	3.66972	24.7706	100
Yes	Asia	Japan	Wood	Hardwoods	Euonymus_oxyphyllus	Buna	Euonymus		Broadleaves	76	44	24	26	18	5	2		0.6	68	76	26	5	2	109	69.7248	4.58716	1.83486	23.8532	100
Yes	Asia	Japan	Wood	Hardwoods	Fagus_crenata	Buna	Fagus		Broadleaves	81	45	21	21	17	4	1		0.7	66	81	21	4	1	107	75.7009	3.73832	0.934579	19.6262	100	1
Yes	Asia	Japan	Wood	Hardwoods	Fagus_crenata	Inubuna	Fagus		Broadleaves	81	50	18	24		2	1		0.5	68	81	24	2	1	108	75	1.85185	0.925926	22.2222	100	1
Yes	Asia	Japan	Wood	Hardwoods	Fagus_japonica	Shioji	Fagus		Broadleaves	79	47	17	25		4	1		0.8	64	79	25	4	1	109	72.4771	3.66972	0.917431	22.9358	100	1
Yes	Asia	Japan	Wood	Hardwoods	Fraxinum_commemoralis	Yachidamo	Fraxinum		Broadleaves	78	57	14	26		3	2		0.5	71	78	26	3	2	109	71.5596	2.75229	1.83486	23.8532	100
Yes	Asia	Japan	Wood	Hardwoods	Fraxinum_mandshurica	Yachidamo	Fraxinum		Broadleaves	82	47	21	20	19	5	1		0.9	68	82	20	5	1	108	75.9259	4.62963	0.925926	18.5185	100
Yes	Asia	Japan	Wood	Hardwoods	Fraxinus_mandshurica	Aodamo	Fraxinus		Broadleaves	80	51	16	22		4	2		l,0	67	80	22	4	2	108	74.0741	3.7037	1.85185	20.3704	100
Yes	Asia	Japan	Wood	Hardwoods	Fraxinus_sieboldiana	Aodamo	Fraxinus		Broadleaves	76	44	20	23	19	7	4		0.7	64	76	23	7	4	110	69.0909	6.36364	3.63636	20.9091	100
Yes	Asia	Japan	Wood	Hardwoods	Fraxinus_sieboldiana	Aohada	Fraxinus		Broadleaves	75	45	17	24		6	4		0.9	62	75	24	6	4	109	68.8073	5.50459	3.66972	22.0183	100
Yes	Asia	Japan	Wood	Hardwoods	llex_macropoda	Onigurumi	llex		Broadleaves	81	34	18	16	32	7	5		0.7	52	81	16	7	5	109	74.3119	6.42202	4.58716	14.6789	100
Yes	Asia	Japan	Wood	Hardwoods	Juglans_ailanthifolia	Onigurumi	Juglans		Broadleaves	80	43	24	21	25	6	4		0.4	67	80	21	6	4	111	72.0721	5.40541	3.6036	18.9189	100
Yes	Asia	Japan	Wood	Hardwoods	Juglans_siebold	Harigiri	Juglans		Broadleaves	78	50	13	22		7	4		0.4	63	78	22	7	4	111	70.2703	6.30631	3.6036	19.8198	100
Yes	Asia	Japan	Wood	Hardwoods	Kalopanax_pictus	Harigiri	Kalopanax		Broadleaves	79	48	23	22	18	4	1		0.3	71	79	22	4	1	106	74.5283	3.77358	0.943396	20.7547	100
Yes	Asia	Japan	Wood	Hardwoods	Kalopanax_ricinifolium	Inuenju	Kalopanax		Broadleaves	79	51	17	23		4	2		0.6	68	79	23	4	2	108	73.1481	3.7037	1.85185	21.2963	100
Yes	Asia	Japan	Wood	Hardwoods	Maackia_amurensis	Inuenju	Maackia		Broadleaves	71	45	22	22	24	5	6		0.6	67	71	22	5	6	104	68.2692	4.80769	5.76923	21.1538	100
Yes	Asia	Japan	Wood	Hardwoods	Maackia_amurensis	Tubunoki	Maackia		Broadleaves	77	53	17	19		5	6		0.3	70	77	19	5	6	107	71.9626	4.6729	5.60748	17.757	100
Yes	Asia	Japan	Wood	Hardwoods	Machilus_thunbergii	Honoki	Machilus		Broadleaves	73	49	15	25		7	5		0.3	64	73	25	7	5	110	66.3636	6.36364	4.54545	22.7273	100
Yes	Asia	Japan	Wood	Hardwoods	Magnolia_obovata	Honoki	Magnolia		Broadleaves	81	44	20	24	17	3	2		0.2	64	81	24	3	2	110	73.6364	2.72727	1.81818	21.8182	100
Yes	Asia	Japan	Wood	Hardwoods	Magnolia_obovata	Yamaguwa	Magnolia		Broadleaves	77	47	15	30		3	2		0.4	62	77	30	3	2	112	68.75	2.67857	1.78571	26.7857	100
Yes	Asia	Japan	Wood	Hardwoods	Morus_bombycis	Yamaguwa	Morus		Broadleaves	72	35	26	21	28	10	9		0.8	61	72	21	10	9	112	64.2857	8.92857	8.03571	18.75	100
Yes	Asia	Japan	Wood	Hardwoods	Morus_bombycis	Asada	Morus		Broadleaves	67	42	15	21		7	8		0.4	57	67	21	7	8	103	65.0485	6.79612	7.76699	20.3883	100
Yes	Asia	Japan	Wood	Hardwoods	Ostrya_japonica	Asada	Ostrya		Broadleaves	78	44	21	21	19	5	2		0.7	65	78	21	5	2	106	73.5849	4.71698	1.88679	19.8113	100
Yes	Asia	Japan	Wood	Hardwoods	Ostrya_japonica	Kiri	Ostrya		Broadleaves	80	48	19	23		4	2		0.5	67	80	23	4	2	109	73.3945	3.66972	1.83486	21.1009	100
Yes	Asia	Japan	Wood	Hardwoods	Paulownia_tomentosa	Kihad	Paulownia		Broadleaves	72	45	16	20		9	8		0.2	61	72	20	9	8	109	66.055	8.25688	7.33945	18.3486	100
Yes	Asia	Japan	Wood	Hardwoods	Phellodendron_amurense	Kihada	Phellodendron		Broadleaves	80	51	14	23		4	1		0.1	65	80	23	4	1	108	74.0741	3.7037	0.925926	21.2963	100
Yes	Asia	Japan	Wood	Hardwoods	Phellodendron_sachalinense	Doronoki	Phellodendron		Broadleaves	80	49	21	19	20	5	1		0.6	70	80	19	5	1	105	76.1905	4.7619	0.952381	18.0952	100
Yes	Asia	Japan	Wood	Hardwoods	Populus_maximowiczii	Doronoki	Populus		Broadleaves	81	47	22	22	20	3	2		0.6	69	81	22	3	2	108	75	2.77778	1.85185	20.3704	100
Yes	Asia	Japan	Wood	Hardwoods	Populus_maximowiczii	Yamanarashi	Populus		Broadleaves	82	53	14	22		2	2		0.7	67	82	22	2	2	108	75.9259	1.85185	1.85185	20.3704	100
Yes	Asia	Japan	Wood	Hardwoods	Populus_sieboldii	Vshikoroshi	Populus		Broadleaves	81	49	19	18		3	3		0.5	68	81	18	3	3	105	77.1429	2.85714	2.85714	17.1429	100
Yes	Asia	Japan	Wood	Hardwoods	Pourthiaea_villosa	Yamazakura	Pourthiaea		Broadleaves	82	45	24	20	19	5	3		0.3	69	82	20	5	3	110	74.5455	4.54545	2.72727	18.1818	100
Yes	Asia	Japan	Wood	Hardwoods	Prunus_donarium	Uwamizuzakura	Prunus		Broadleaves	73	48	21	18		6	5		0.3	69	73	18	6	5	102	71.5686	5.88235	4.90196	17.6471	100
Yes	Asia	Japan	Wood	Hardwoods	Prunus_grayana	Shirozakura	Prunus		Broadleaves	78	39	23	20	21	5	4		0.7	62	78	20	5	4	107	72.8972	4.6729	3.73832	18.6916	100
Yes	Asia	Japan	Wood	Hardwoods	Prunus_maximowiczii	Ezonouwamizuzakura	Prunus		Broadleaves	82	46	24	18	24	5	2		0.2	70	82	18	5	2	107	76.6355	4.6729	1.86916	16.8224	100
Yes	Asia	Japan	Wood	Hardwoods	Prunus_padus	Ezoyamazakura	Prunus		Broadleaves	81	36	22	21	28	5	2		0.6	58	81	21	5	2	109	74.3119	4.58716	1.83486	19.2661	100
Yes	Asia	Japan	Wood	Hardwoods	Prunus_sargentii	Shurizakura	Prunus		Broadleaves	80	44	23	18	28	9	5		0.3	67	80	18	9	5	112	71.4286	8.03571	4.46429	16.0714	100
Yes	Asia	Japan	Wood	Hardwoods	Prunus_ssiori	Sawagurumi	Prunus		Broadleaves	74	40	24	21	27	6	5		0.4	64	74	21	6	5	106	69.8113	5.66038	4.71698	19.8113	100
Yes	Asia	Japan	Wood	Hardwoods	Pterocarya_rhoifolia	Sawagurumi	Pterocarya		Broadleaves	83	44	21	18	25	4	4		0.3	65	83	18	4	4	109	76.1468	3.66972	3.66972	16.5138	100
Yes	Asia	Japan	Wood	Hardwoods	Pterocarya_rhoifolia	Kunugi	Pterocarya		Broadleaves	78	48	14	24		3	2		0.4	62	78	24	3	2	107	72.8972	2.80374	1.86916	22.4299	100
Yes	Asia	Japan	Wood	Hardwoods	Quercus_acutissima	Mizunara	Quercus		Broadleaves	78	50	18	19		4	0.5		0.6	68	78	19	4	0.5	101.5	76.8473	3.94089	0.492611	18.7192	100	1
Yes	Asia	Japan	Wood	Hardwoods	Quercus_crispula	Mizunarag	Quercus		Broadleaves	79	45	22	22	22	9	2		0.3	67	79	22	9	2	112	70.5357	8.03571	1.78571	19.6429	100	1
Yes	Asia	Japan	Wood	Hardwoods	Quercus_crispula	Kashiwa	Quercus		Broadleaves	75	48	20	26		6	1		0.2	68	75	26	6	1	108	69.4444	5.55556	0.925926	24.0741	100	1
Yes	Asia	Japan	Wood	Hardwoods	Quercus_dentata	Konara	Quercus		Broadleaves	73	31	24	25	23	9	5		0.6	55	73	25	9	5	112	65.1786	8.03571	4.46429	22.3214	100	1
Yes	Asia	Japan	Wood	Hardwoods	Quercus_serrata	Ezokuromemodoki	Quercus		Broadleaves	78	50	17	22		6	1		0.6	67	78	22	6	1	107	72.8972	5.60748	0.934579	20.5607	100	1
Yes	Asia	Japan	Wood	Hardwoods	Rhamnus_japonica	Harienju	Rhamnus		Broadleaves	84	42	26	21	20	6	2		0.4	68	84	21	6	2	113	74.3363	5.30973	1.76991	18.5841	100
Yes	Asia	Japan	Wood	Hardwoods	Robinia_pseudoacacia	Bakkoyanagi	Robinia		Broadleaves	82	50	24	21	18	5	3		0.3	74	82	21	5	3	111	73.8739	4.5045	2.7027	18.9189	100
Yes	Asia	Japan	Wood	Hardwoods	Salix_bakko	Ezonokinuyanagi	Salix		Broadleaves	82	43	22	20	23	3	2		0.4	65	82	20	3	2	107	76.6355	2.80374	1.86916	18.6916	100
Yes	Asia	Japan	Wood	Hardwoods	Salix_petsusu	Nagabayanagi	Salix		Broadleaves	80	41	23	22	23	4	3		0.3	64	80	22	4	3	109	73.3945	3.66972	2.75229	20.1835	100
Yes	Asia	Japan	Wood	Hardwoods	Salix_sachalinensis	Niwatoko	Salix		Broadleaves	84	38	19	20	25	4	3		0.3	57	84	20	4	3	111	75.6757	3.6036	2.7027	18.018	100
Yes	Asia	Japan	Wood	Hardwoods	Sambucus_sieboldiana	Kojii	Sambucus		Broadleaves	79	46	23	26	18	3	2		0.6	69	79	26	3	2	110	71.8182	2.72727	1.81818	23.6364	100
Yes	Asia	Japan	Wood	Hardwoods	Shiia_cuspidata	Shiinoki	Shiia		Broadleaves	79	48	16	23		3	2		0.4	64	79	23	3	2	107	73.8318	2.80374	1.86916	21.4953	100
Yes	Asia	Japan	Wood	Hardwoods	Shiia_sieboldii	Azukinashi	Shiia		Broadleaves	65	37	15	28		13	3		0.2	52	65	28	13	3	109	59.633	11.9266	2.75229	25.6881	100
Yes	Asia	Japan	Wood	Hardwoods	Sorbus_alnifolia	Nanakamado	Sorbus		Broadleaves	80	44	22	20	22	3	1		0.4	66	80	20	3	1	104	76.9231	2.88462	0.961538	19.2308	100
Yes	Asia	Japan	Wood	Hardwoods	Sorbus_commixta	Himeshara	Sorbus		Broadleaves	80	46	21	20	24	7	3		0.6	67	80	20	7	3	110	72.7273	6.36364	2.72727	18.1818	100
Yes	Asia	Japan	Wood	Hardwoods	Stewartia_monadelpha	Hakuunboku	Stewartia		Broadleaves	69	44	15	25		3	1		0.6	59	69	25	3	1	98	70.4082	3.06122	1.02041	25.5102	100
Yes	Asia	Japan	Wood	Hardwoods	Styrax_obassia	Hashidoi	Styrax		Broadleaves	83	45	24	21	30	4	2		0.6	69	83	21	4	2	110	75.4545	3.63636	1.81818	19.0909	100
Yes	Asia	Japan	Wood	Hardwoods	Syringa_reticulata	Shinanuki	Syringa		Broadleaves	78	44	22	20	24	6	4		0.4	66	78	20	6	4	108	72.2222	5.55556	3.7037	18.5185	100
Yes	Asia	Japan	Wood	Hardwoods	Tilia_japonica	Shinanuki	Tilia		Broadleaves	80	43	20	17	26	6	7		0.8	63	80	17	6	7	110	72.7273	5.45455	6.36364	15.4545	100
Yes	Asia	Japan	Wood	Hardwoods	Tilia_japonica	Obabodaiju	Tilia		Broadleaves	79	46	18	20		3	4		0.2	64	79	20	3	4	106	74.5283	2.83019	3.77358	18.8679	100
Yes	Asia	Japan	Wood	Hardwoods	Tilia_maximowicziana	Obabodaiju	Tilia		Broadleaves	82	44	23	17	25	5	6		0.6	67	82	17	5	6	110	74.5455	4.54545	5.45455	15.4545	100
Yes	Asia	Japan	Wood	Hardwoods	Tilia_maximowicziana	Obayanagi	Tilia		Broadleaves	82	46	18	21		3	3		0.6	64	82	21	3	3	109	75.2294	2.75229	2.75229	19.2661	100
Yes	Asia	Japan	Wood	Hardwoods	Toisusu_urbaniana	Harunire	Toisusu		Broadleaves	80	50	15	21		2	2		0.9	65	80	21	2	2	105	76.1905	1.90476	1.90476	20	100
Yes	Asia	Japan	Wood	Hardwoods	Ulmus_davidiana	Keyaki	Ulmus		Broadleaves	80	51	20	21	15	3	1		0.9	71	80	21	3	1	105	76.1905	2.85714	0.952381	20	100
Yes	Asia	Japan	Wood	Hardwoods	Ulmus_laciniata	Ohyo	Ulmus		Broadleaves	79	36	24	23	23	4	2		1.4	60	79	23	4	2	108	73.1481	3.7037	1.85185	21.2963	100
Yes	Asia	Japan	Wood	Hardwoods	Ulmus_propinqua	Harunire	Ulmus		Broadleaves	79	47	15	27		2	0.5		0.8	62	79	27	2	0.5	108.5	72.8111	1.84332	0.460829	24.8848	100
Yes	Asia	Japan	Wood	Hardwoods	Zelkova_serrata	Momi	Zelkova		Broadleaves	75	44	16	27		8	1		0.8	60	75	27	8	1	111	67.5676	7.20721	0.900901	24.3243	100
Yes	Asia	Japan	Wood	Softwoods	Abies_firma	Urajiromomi	Abies		Conifers	70	49	5	34		4	2		1	54	70	34	4	2	110	63.6364	3.63636	1.81818	30.9091	100	1
Yes	Asia	Japan	Wood	Softwoods	Abies_homolepis	Aomoritodomatsu	Abies		Conifers	77	53	6	29		2	2		0.2	59	77	29	2	2	110	70	1.81818	1.81818	26.3636	100	1
Yes	Asia	Japan	Wood	Softwoods	Abies_mariesii	Aotodo_Matsu	Abies		Conifers	72	50	8	30		2	2		2.3	58	72	30	2	2	106	67.9245	1.88679	1.88679	28.3019	100	1
Yes	Asia	Japan	Wood	Softwoods	Abies_mayriana	Todomatsu	Abies		Conifers	74	44	13	30	13	3	1		0.2	57	74	30	3	1	108	68.5185	2.77778	0.925926	27.7778	100	1
Yes	Asia	Japan	Wood	Softwoods	Abies_sachalininensis	Todomatsu	Abies		Conifers	70	41	13	29	12	5	3		0.5	54	70	29	5	3	107	65.4206	4.6729	2.80374	27.1028	100	1
Yes	Asia	Japan	Wood	Softwoods	Abies_sachalininensis	Shirabe	Abies		Conifers	74	49	5	30		3	3		0.3	54	74	30	3	3	110	67.2727	2.72727	2.72727	27.2727	100	1
Yes	Asia	Japan	Wood	Softwoods	Abies_veitchii	Hinoki	Abies		Conifers	73	47	6	29		2	2		0.2	53	73	29	2	2	106	68.8679	1.88679	1.88679	27.3585	100	1
Yes	Asia	Japan	Wood	Softwoods	Chamaecyparis_obtusa	Momi	Chamaecyparis		Conifers	69	39	5	33		4	5		0.5	44	69	33	4	5	111	62.1622	3.6036	4.5045	29.7297	100
Yes	Asia	Japan	Wood	Softwoods	Chamaecyparis_pisifera	Sugih	Chamaecyparis		Conifers	60	47	5	29		7	9		0.4	52	60	29	7	9	105	57.1429	6.66667	8.57143	27.619	100
Yes	Asia	Japan	Wood	Softwoods	Criptomeria_ja	Karamatsu	Criptomeria		Conifers	71	47	7	33		3	3		0.7	54	71	33	3	3	110	64.5455	2.72727	2.72727	30	100
Yes	Asia	Japan	Wood	Softwoods	Larix_leptole	Karamatsu	Larix		Conifers	67	40	12	31	19	7	1		0.4	52	67	31	7	1	106	63.2075	6.60377	0.943396	29.2453	100	1
Yes	Asia	Japan	Wood	Softwoods	Larix_leptole	Doitsutohi	Larix		Conifers	69	48	6	28		10	3		0.3	54	69	28	10	3	110	62.7273	9.09091	2.72727	25.4545	100	1
Yes	Asia	Japan	Wood	Softwoods	Picea_abies	Akaezomatsu	Picea		Conifers	73	38	12	29	12	2	1		0.4	50	73	29	2	1	105	69.5238	1.90476	0.952381	27.619	100	1	1
Yes	Asia	Japan	Wood	Softwoods	Picea_glehnii	Akaezomatsu	Picea		Conifers	75	45	14	27	14	2	0.5		0.4	59	75	27	2	0.5	104.5	71.7703	1.91388	0.478469	25.8373	100	1
Yes	Asia	Japan	Wood	Softwoods	Picea_glehnii	Tohi	Picea		Conifers	74	50	7	28		2	2		0.2	57	74	28	2	2	106	69.8113	1.88679	1.88679	26.4151	100	1
Yes	Asia	Japan	Wood	Softwoods	Picea_hondoensis	Ezomatsu	Picea		Conifers	64	42	5	29		3	2		0.2	47	64	29	3	2	98	65.3061	3.06122	2.04082	29.5918	100	1
Yes	Asia	Japan	Wood	Softwoods	Picea_jezoensis	Ezomatsu	Picea		Conifers	75	44	14	29	13	3	1		0.1	58	75	29	3	1	108	69.4444	2.77778	0.925926	26.8519	100	1
Yes	Asia	Japan	Wood	Softwoods	Picea_jezoensis	Bankusumatsu	Picea		Conifers	71	47	6	28		4	1		0.2	53	71	28	4	1	104	68.2692	3.84615	0.961538	26.9231	100	1
Yes	Asia	Japan	Wood	Softwoods	Pinus_banksiana	Akamatsu	Pinus		Conifers	71	40	14	28	13	2	1		0.1	54	71	28	2	1	102	69.6078	1.96078	0.980392	27.451	100	1
Yes	Asia	Japan	Wood	Softwoods	Pinus_densijlora	Goyomutsu	Pinus		Conifers	67	45	8	27		4	3		0.2	53	67	27	4	3	101	66.3366	3.9604	2.9703	26.7327	100	1
Yes	Asia	Japan	Wood	Softwoods	Pinus_pentaphylla	Himekomatsu	Pinus		Conifers	71	32	12	26	19	6	8		0.1	44	71	26	6	8	111	63.964	5.40541	7.20721	23.4234	100	1
Yes	Asia	Japan	Wood	Softwoods	Pinus_pentaphylla	Haimatsu	Pinus		Conifers	68	45	5	27		3	8		0.3	50	68	27	3	8	106	64.1509	2.83019	7.54717	25.4717	100	1
Yes	Asia	Japan	Wood	Softwoods	Pinus_pumila	Sutorobumatsu	Pinus		Conifers	63	30	12	26	23	9	12		0.2	42	63	26	9	12	110	57.2727	8.18182	10.9091	23.6364	100	1
Yes	Asia	Japan	Wood	Softwoods	Pinus_strobus	Kuromatsu	Pinus		Conifers	71	41	13	28	19	4	7		0.5	54	71	28	4	7	110	64.5455	3.63636	6.36364	25.4545	100	1
Yes	Asia	Japan	Wood	Softwoods	Pinus_thunbergii	inumaki	Pinus		Conifers	63	44	7	26		3	3		0.2	51	63	26	3	3	95	66.3158	3.15789	3.15789	27.3684	100	1
Yes	Asia	Japan	Wood	Softwoods	Podocarpus_macrophyllus	Toyasawara	Podocarpus		Conifers	65	49	11	36		3	2		0.4	60	65	36	3	2	106	61.3208	2.83019	1.88679	33.9623	100
Yes	Asia	Japan	Wood	Softwoods	Pseudotsuga_japonica	Koyamaki	Pseudotsuga		Conifers	68	47	5	33		4	4		0.1	52	68	33	4	4	109	62.3853	3.66972	3.66972	30.2752	100	1
Yes	Asia	Japan	Wood	Softwoods	Sciadopitys_verticillata	Onko	Sciadopitys		Conifers	61	39	5	29		7	11		0.2	44	61	29	7	11	108	56.4815	6.48148	10.1852	26.8519	100
Yes	Asia	Japan	Wood	Softwoods	Taxus_cuspidata	Ichii	Taxus		Conifers	63	33	12	29	26	14	14		0.2	45	63	29	14	14	120	52.5	11.6667	11.6667	24.1667	100
Yes	Asia	Japan	Wood	Softwoods	Taxus_cuspidata	Nezuko	Taxus		Conifers	59	38	6	28		11	12		0.2	44	59	28	11	12	110	53.6364	10	10.9091	25.4545	100
Yes	Asia	Japan	Wood	Softwoods	Thuja_standishii	Asunaro	Thuja		Conifers	70	48	6	27		11	9		0.3	54	70	27	11	9	117	59.8291	9.40171	7.69231	23.0769	100
Yes	Asia	Japan	Wood	Softwoods	Thujopsis_dolabrata	Hinokiasunaro	Thujopsis		Conifers	62	41	6	32		4	4		0.4	47	62	32	4	4	102	60.7843	3.92157	3.92157	31.3725	100
Yes	Asia	Japan	Wood	Softwoods	Thujopsis_dolabrata	Hinokiasunaro	Thujopsis		Conifers	71	39	13	29	16	5	4		0.3	52	71	29	5	4	109	65.1376	4.58716	3.66972	26.6055	100
Yes	Asia	Japan	Wood	Softwoods	Thujopsis_dolabrata	Hinokiasunaro	Thujopsis		Conifers	75	48	6	33		5	4		0.7	54	75	33	5	4	117	64.1026	4.2735	3.4188	28.2051	100
Yes	Asia	Japan	Wood	Softwoods	Torreya_nucifera	Kaya	Torreya		Conifers	64	45	5	35		7	7		0.7	50	64	35	7	7	113	56.6372	6.19469	6.19469	30.9735	100
Yes	Asia	Japan	Wood	Softwoods	Tsuga_sieboldii	Tsuga	Tsuga		Conifers	71	51	4	31		4	3		0.2	55	71	31	4	3	109	65.1376	3.66972	2.75229	28.4404	100
Yes	URSS	Caucasus	Wood	Hardwoods	A1lanthus_glandulosus	Tree_of_heaven	Allanthus		Broadleaves		46	18	14		3	3	6	0.9	64	75.4867	14	3	3	95.4867	79.0547	3.1418	3.1418	14.6617	100
Yes	URSS	Leningrad	Wood	Hardwoods	Alnus_glutinosa	European_alder	Alnus		Broadleaves		48	24	22		0.5	3	0.9	0.3	72	80.7361	22	0.5	3	106.236	75.9969	0.47065	2.8239	20.7086	100
Yes	URSS	Central_Asia	Wood	Hardwoods	Ammodendron_conollyi	Sandy_acacia	Ammodendron		Broadleaves		43	21	26		2	3	4.2	0.4	64	75.4867	26	2	3	106.487	70.8884	1.87817	2.81725	24.4162	100
Yes	URSS	Crimea	Wood	Hardwoods	Arbutus_andrache	Strawberry_tree	Arbutus		Broadleaves		38	26	24		1	11	0.7	0.8	64	75.4867	24	1	11	111.487	67.7092	0.896968	9.86664	21.5272	100
Yes	URSS	Far_Eastern	Wood	Hardwoods	Betula_dahurica	Dahurian_birch	Betula		Broadleaves		50	27	19		0.5	2	1.6	0.2	77	84.017	19	0.5	2	105.517	79.6241	0.473857	1.89543	18.0066	100
Yes	URSS	Far_Eastern	Wood	Hardwoods	Betula_schmidtii	Schmidts_birch	Betula		Broadleaves		47	25	18		0.5	9	1.2	0.2	72	80.7361	18	0.5	9	108.236	74.5926	0.461953	8.31515	16.6303	100
Yes	URSS	Central_Asia	Wood	Hardwoods	Betula_tianschanica	Tien_shan_birch	Betula		Broadleaves		43	32	19		1	2	2.2	0.3	75	82.7047	19	1	2	104.705	78.9885	0.955067	1.91013	18.1463	100
Yes	URSS	Caucasus	Wood	Hardwoods	Buxus_sempervirens	Box_tree	Buxus		Broadleaves		40	26	30		1	3	0.8	0.5	66	76.7991	30	1	3	110.799	69.3138	0.902535	2.7076	27.076	100
Yes	URSS	Caucasus	Wood	Hardwoods	Carpinus_betulus	Common_hornbeam	Carpinus		Broadleaves		47	26	19		1	1	0.9	0.5	73	81.3923	19	1	1	102.392	79.4906	0.976636	0.976636	18.5561	100
Yes	URSS	Caucasus	Wood	Hardwoods	Castanea_sativa	Sweet_chestnut	Castanea		Broadleaves		43	20	22		3	8	1.4	0.4	63	74.8306	22	3	8	107.831	69.3964	2.78214	7.41905	20.4024	100
Yes	URSS	Crimea	Wood	Hardwoods	Celtis_austriaca	Hackberry	Celtis		Broadleaves		42	29	21		2	7	0.8	1.3	71	80.08	21	2	7	110.08	72.7471	1.81686	6.35901	19.077	100
Yes	URSS	Central_Chemozem	Wood	Hardwoods	Corylus_avellana	European_filbert	Corylus		Broadleaves		47	29	22		1	3	0.6	0.4	76	83.3608	22	1	3	109.361	76.2255	0.914404	2.74321	20.1169	100
Yes	URSS	Leningrad	Wood	Hardwoods	Cotoneaster_vulgaris	Juneberry	Cotoneaster		Broadleaves		44	31	22		0.5	1	0.5	0.4	75	82.7047	22	0.5	1	106.205	77.8729	0.470789	0.941578	20.7147	100
Yes	URSS	Caucasus	Wood	Hardwoods	Disopyros_lotus	Date_plum_persimmon	Disopyros		Broadleaves		45	24	19		2	4	2.3	0.8	69	78.7676	19	2	4	103.768	75.9077	1.92738	3.85477	18.3101	100
Yes	URSS	Central_Chernozem	Wood	Hardwoods	Fraxinus_excelsior	Common_ash	Fraxinus		Broadleaves		44	25	25		1	3	1.2	0.5	69	78.7676	25	1	3	107.768	73.0902	0.927923	2.78377	23.1981	100
Yes	URSS	Central_Asia	Wood	Hardwoods	Haloxylon_aphyllum	Black_haloxylon	Haloxylon		Broadleaves		32	21	28		3	1.3	0.7	2.9	53	68.2688	28	3	1.3	100.569	67.8827	2.98303	1.29265	27.8416	100
Yes	URSS	Far_Eastern	Wood	Hardwoods	Juglans_manschurica	Manchurian_walnut	Juglans		Broadleaves		51	16	20		2	4	2.2	0.4	67	77.4553	20	2	4	103.455	74.8684	1.9332	3.86641	19.332	100
Yes	URSS	Caucasus	Wood	Hardwoods	Juglans_regia	Persian_walnut	Juglans		Broadleaves		49	20	22		1	5	2.2	0.5	69	78.7676	22	1	5	106.768	73.7748	0.936614	4.68307	20.6055	100
Yes	URSS	Crimea	Wood	Hardwoods	Laurus_nobilis	True_bay	Laurus		Broadleaves		43	29	21		3	5	0.7	0.7	72	80.7361	21	3	5	109.736	73.573	2.73383	4.55638	19.1368	100
Yes	URSS	Caucasus	Wood	Hardwoods	Maclura_aurantiaca	Osage_orange	Maclura		Broadleaves		40	21	19		2	9	3	0.6	61	73.5182	19	2	9	103.518	71.0196	1.93203	8.69412	18.3543	100
Yes	URSS	Crimea	Wood	Hardwoods	Olea_europaea	Common_olive	Olea		Broadleaves		43	24	20		1	14	2.4	1	67	77.4553	20	1	14	112.455	68.8765	0.889243	12.4494	17.7849	100
Yes	URSS	Caucasus	Wood	Hardwoods	Ostrya_carpinifolia	Hop_hornbeam	Ostrya		Broadleaves		49	24	21		1	2	0.8	0.6	73	81.3923	21	1	2	105.392	77.2279	0.948836	1.89767	19.9256	100
Yes	URSS	Caucasus	Wood	Hardwoods	Paulownia_tomentosa	Royal_pavlownia	Paulownia		Broadleaves		46	24	20		2	6	1.2	0.3	70	79.4238	20	2	6	107.424	73.935	1.86179	5.58536	18.6179	100
Yes	URSS	Caucasus	Wood	Hardwoods	Parrotia_persica	Persian_ironwood	Parrotia		Broadleaves		46	26	20		1	2	1.4	0.5	72	80.7361	20	1	2	103.736	77.8284	0.963984	1.92797	19.2797	100
Yes	URSS	Far_Eastern	Wood	Hardwoods	Phellodendron_amurense	Amur_cork_tree	Phellodendron		Broadleaves		48	20	22		2	2	0.8	0.4	68	78.1114	22	2	2	104.111	75.0268	1.92102	1.92102	21.1312	100
Yes	URSS	Caucasus	Wood	Hardwoods	Pirus_communis	Common_pear	Pirus		Broadleaves		44	26	24		1	2	0.7	0.4	70	79.4238	24	1	2	106.424	74.6297	0.93964	1.87928	22.5514	100
Yes	URSS	Caucasus	Wood	Hardwoods	Pirus_malus	Apple_tree	Pirus		Broadleaves		45	24	25		1	1	0.8	0.5	69	78.7676	25	1	1	105.768	74.4723	0.945469	0.945469	23.6367	100
Yes	URSS	Caucasus	Wood	Hardwoods	Pistacia_mutica	Turkish_terehinth	Pistacia		Broadleaves		34	23	22		4	9	3.3	0.2	57	70.8935	22	4	9	105.894	66.9479	3.77738	8.4991	20.7756	100
Yes	URSS	Caucasus	Wood	Hardwoods	Platanus_orientalis	Oriental_plane	Platanus		Broadleaves		44	21	21		1	3	1.2	1.3	65	76.1429	21	1	3	101.143	75.2825	0.9887	2.9661	20.7627	100
Yes	URSS	Central_Eastern	Wood	Hardwoods	Populus_nigra	Black_poplar	Populus		Broadleaves		48	23	19		1	5	1.8	0.4	71	80.08	19	1	5	105.08	76.2086	0.951656	4.75828	18.0815	100
Yes	URSS	Caucasus	Wood	Hardwoods	Prunus_avium	Gean_tree	Prunus		Broadleaves		45	24	18		1	7	2.8	0.3	69	78.7676	18	1	7	104.768	75.1832	0.954494	6.68145	17.1809	100
Yes	URSS	Caucasus	Wood	Hardwoods	Prunus_laurocerasus	Cherry_laurel	Prunus		Broadleaves		45	26	27		1	1	0.5	0.5	71	80.08	27	1	1	109.08	73.414	0.916759	0.916759	24.7525	100
Yes	URSS	Leningrad	Wood	Hardwoods	Prunus_padus	Bird_cherry	Prunus		Broadleaves		47	28	20		1	1	0.5	0.2	75	82.7047	20	1	1	104.705	78.9885	0.955067	0.955067	19.1013	100
Yes	URSS	Crimea	Wood	Hardwoods	Punica_granatum	Pomegranate	Punica		Broadleaves		39	25	21		3	4	0.8	1.2	64	75.4867	21	3	4	103.487	72.9434	2.89892	3.86523	20.2925	100
Yes	URSS	Far_Eastern	Wood	Hardwoods	Quercus_mongolica	Mongolian_oak	Quercus		Broadleaves		47	24	22		2	2	0.9	0.2	71	80.08	22	2	2	106.08	75.4902	1.88537	1.88537	20.7391	100	1
Yes	URSS	Central_Chernozem	Wood	Hardwoods	Quercus_sessiliflora	Sessile_oak	Quercus		Broadleaves		44	23	24		2	3	0.9	0.3	67	77.4553	24	2	3	106.455	72.7585	1.87872	2.81809	22.5447	100	1	1
Yes	URSS	Central_Chernozem	Wood	Hardwoods	Salix_alba	White_willow	Salix		Broadleaves		46	25	28		1	2	1.2	0.5	71	80.08	28	1	2	111.08	72.0922	0.900252	1.8005	25.2071	100
Yes	URSS	Caucasus	Wood	Hardwoods	Sambucus_nigra	Common_alder	Sambucus		Broadleaves		48	25	30		1	2	0.4	0.6	73	81.3923	30	1	2	114.392	71.1519	0.874185	1.74837	26.2255	100
Yes	URSS	Leningrad	Wood	Hardwoods	Sorbus_aucuparia	Mountain_ash	Sorbus		Broadleaves		46	30	22		1	3	0.9	0.6	76	83.3608	22	1	3	109.361	76.2255	0.914404	2.74321	20.1169	100
Yes	URSS	Caucasus	Wood	Hardwoods	Sorbus_tonninalis	Birch	Sorbus		Broadleaves		42	27	26		0.5	1	0.4	0.7	69	78.7676	26	0.5	1	106.268	74.1219	0.47051	0.941021	24.4665	100
Yes	URSS	Crimea	Wood	Hardwoods	Tamarix_gallica	Tamarisk	Tamarix		Broadleaves		35	21	18		9	8	0.7	5.4	56	70.2373	18	9	8	105.237	66.7418	8.5521	7.60186	17.1042	100
Yes	URSS	Far_Eastern	Wood	Hardwoods	Tilia_amurensis	Amur_linden	Tilia		Broadleaves		43	23	18		2	4	7.7	0.7	66	76.7991	18	2	4	100.799	76.1903	1.98415	3.96829	17.8573	100
Yes	URSS	Central_Chernozem	Wood	Hardwoods	Tilia_cordata	Small_leaved_linden	Tilia		Broadleaves		50	23	18		1	2	5.7	0.6	73	81.3923	18	1	2	102.392	79.4906	0.976636	1.95327	17.5794	100
Yes	URSS	Central_Chernozem	Wood	Hardwoods	Ulmus_laevis	Russian_elm	Ulmus		Broadleaves		52	20	22		2	2	1	0.7	72	80.7361	22	2	2	106.736	75.6409	1.87378	1.87378	20.6116	100
Yes	URSS	Caucasus	Wood	Hardwoods	Zelcova_carpinifolia	Zelkova_elm	Zelcova		Broadleaves		33	21	20		1	15	l,7	0.8	54	68.925	20	1	15	104.925	65.6898	0.953062	14.2959	19.0612	100
Yes	URSS	Caucasus	Wood	Softwoods	Abies_nordmannana	Nordmann_fir	Abies		Conifers		46	10	29		0.5	4	2.5	0.4	56	70.2373	29	0.5	4	103.737	67.7069	0.481987	3.85589	27.9552	100	1
Yes	URSS	Siberia	Wood	Softwoods	Abies_sibirica	Siberian_fir	Abies		Conifers		51	5	30		1	2	0.9	0.7	56	70.2373	30	1	2	103.237	68.0348	0.968642	1.93728	29.0593	100	1
Yes	URSS	Far_Eastern	Wood	Softwoods	Larix_dahurica	Dahurian_larch	Larix		Conifers		52	12	27		2	1	1.3	0.2	64	75.4867	27	2	1	105.487	71.5604	1.89597	0.947986	25.5956	100	1
Yes	URSS	Siberia	Wood	Softwoods	Larix_sibirica	Siberian_larch	Larix		Conifers		46	9	30		5	2	1.8	1	55	69.5812	30	5	2	106.581	65.2847	4.69126	1.8765	28.1476	100	1
Yes	URSS	Central_Asia	Wood	Softwoods	Picea_schrenkiana	Schrenk_spruce	Picea		Conifers		41	13	33		1	2	0.6	0.6	54	68.925	33	1	2	104.925	65.6898	0.953062	1.90612	31.451	100	1
Yes	URSS	Siberia	Wood	Softwoods	Pinus_sibirica	Siberian_stone_pine	Pinus		Conifers		53	9	30		2	3	2.4	0.1	62	74.1744	30	2	3	109.174	67.9412	1.83193	2.7479	27.479	100	1
Yes	URSS	Leningrad	Wood	Softwoods	Pinus_sylvestris	Scotch_pine	Pinus		Conifers		54	11	28		1	1	1.6	0.2	65	76.1429	28	1	1	106.143	71.7362	0.942126	0.942126	26.3795	100	1	1
Yes	URSS	Caucasus	Wood	Softwoods	Taxus_baccata	English_yew	Taxus		Conifers		43	12	29		1	3	2.3	0.4	55	69.5812	29	1	3	102.581	67.8304	0.974838	2.92451	28.2703	100

## Sheet: Foliage
IsIncluded	Network	Publication	Climate	Region	SiteName	Latitude	Longititude	Organ	Species	CommonSpeciesName	Genus	Familly	IsTree	FunctionalType	percA	percW	percE	percN	Note	Total	CellSoluble	Cellulose	Hemicellulose	Lignin	Non-polarExtractable	WaterSolubleExtractable	AcidSoluble	KlasonLignin	Lignin	NonpolarExtractives	Tannins	WaterSolubleCarbohydrates	AcidSolubleCarbohydrates	Water	Ethanol	Lignin	Rhamnan	Xylan	Galactan	Mannan	Araban	Glucans	NonpolarExtractables	WaterSoluble_sugars	WaterSoluble_phenols	AcidSoluble	Lignin	NPE	acetone
Yes	Independent	HoubbieETAL_2006	Non-tropical	Poland				Leaf	Abies_alba_Mill.	Silver_fir			1	Conifers	32.3948	37.0842		30.521		998	370.1	199.9	123.4	304.6
Yes	Independent	HoubbieETAL_2006	Non-tropical	Poland				Leaf	Acer_platanoides_L.	Norway_maple			1	Broadleaves	34.1855	53.193		12.6216		997.5	530.6	180.2	160.8	125.9
Yes	Independent	HoubbieETAL_2006	Non-tropical	Poland				Leaf	Acer_pseudoplatanus_L.	Sycamore_maple			1	Broadleaves	30.7615	52.5251		16.7134		998	524.2	184.3	122.7	166.8
Yes	Independent	HoubbieETAL_2006	Non-tropical	Poland				Leaf	Betula_pedula_Roth	Silver_birch			1	Broadleaves	31.2074	27.8781		40.9146		997.2	278	186.8	124.4	408
Yes	Independent	HoubbieETAL_2006	Non-tropical	Poland				Leaf	Carpinus_betula_L.	European_hornbeam			1	Broadleaves	35.7566	49.8243		14.4191		995.9	496.2	200.8	155.3	143.6
Yes	Independent	HoubbieETAL_2006	Non-tropical	Poland				Leaf	Fagus_sylvatica_L.	European_beech			1	Broadleaves	37.148	38.2303		24.6217		997.9	381.5	231.9	138.8	245.7
Yes	Independent	HoubbieETAL_2006	Non-tropical	Poland				Leaf	Larix_decidua_Miller				1	Conifers	31.5388	36.6416		31.8195		997.5	365.5	222	92.6	317.4
Yes	Independent	HoubbieETAL_2006	Non-tropical	Poland				Leaf	Picea_abies_(L.)_H._Karst	Norway_spruce			1	Conifers	37.0103	41.5389		21.4508		998.1	414.6	231.3	138.1	214.1
Yes	Independent	HoubbieETAL_2006	Non-tropical	Poland				Leaf	Pinus_nigra_J.F.Arnold	Black_pine			1	Conifers	47.0647	29.0222		23.913		998.2	289.7	316	153.8	238.7
Yes	Independent	HoubbieETAL_2006	Non-tropical	Poland				Leaf	Pinus_sylvestris_L.	Scots_pine			1	Conifers	43.2909	39.0119		17.6972		997.9	389.3	298.8	133.2	176.6
Yes	Independent	HoubbieETAL_2006	Non-tropical	Poland				Leaf	Pseudotsuga_menziesii_(Mirb.)_Franco				1	Conifers	29.5179	45.665		24.8171		997.7	455.6	182.2	112.3	247.6
Yes	Independent	HoubbieETAL_2006	Non-tropical	Poland				Leaf	Quercus_robur_L.	English_oak			1	Broadleaves	37.6754	38.9279		23.3968		998	388.5	222.3	153.7	233.5
Yes	Independent	HoubbieETAL_2006	Non-tropical	Poland				Leaf	Quercus_rubra_L.	Red_oak			1	Broadleaves	38.2565	41.8637		19.8798		998	417.8	232.2	149.6	198.4
Yes	Independent	HoubbieETAL_2006	Non-tropical	Poland				Leaf	Tilia_cordata_Mill.	Small-leaved_Lime			1	Broadleaves	30.9999	27.1688		41.8313		997.1	270.9	193.6	115.5	417.1
Yes	CIDET	TrofymowETAL_1995	Non-tropical	Canada				Leaf	Chamaecyparis_nootkatensis_D._Don	Yellow_cypress			1	Conifers	33.097	26.4969	16.5785	23.8275		932.41					154.58	247.06	308.6	222.17
Yes	CIDET	TrofymowETAL_1995	Non-tropical	Canada				Leaf	Pseudotsuga_menziesii_(Mirb.)_Franco	Douglas_fir			1	Conifers	41.6997	13.0102	12.5596	32.7305		938.88					117.92	122.15	391.51	307.3
Yes	CIDET	TrofymowETAL_1995	Non-tropical	Canada				Leaf	Pseudotsuga_menziesii_(Mirb.)_Franco	Douglas_fir			1	Conifers	44.4314	12.2471	10.9579	32.3636		937.04					102.68	114.76	416.34	303.26
Yes	CIDET	TrofymowETAL_1995	Non-tropical	Canada				Leaf	Pseudotsuga_menziesii_(Mirb.)_Franco	Douglas_fir			1	Conifers	33.3699	34.6403	9.59022	22.3997		949.3					91.04	328.84	316.78	212.64
Yes	CIDET	TrofymowETAL_1995	Non-tropical	Canada				Leaf	Abies_amabilis_(Dougl.)_Forbes	Pacific_silver_fir			1	Conifers	29.1772	31.3569	13.2088	26.2571		965.72					127.56	302.82	281.77	253.57
Yes	CIDET	TrofymowETAL_1995	Non-tropical	Canada				Leaf	Abies_balsamea_(L.)_Mill.	Balsam_fir			1	Conifers	31.0665	27.2674	13.6188	28.0474		970.5					132.17	264.63	301.5	272.2
Yes	CIDET	TrofymowETAL_1995	Non-tropical	Canada				Leaf	Abies_lasiocarpa_(Hook.)_Nutt.	Subalpine_fir			1	Conifers	26.7345	35.9226	14.6972	22.6457		946.98					139.18	340.18	253.17	214.45
Yes	CIDET	TrofymowETAL_1995	Non-tropical	Canada				Leaf	Tsuga_mertensiana_(Bong.)_Carr.	Mountain_hemlock			1	Conifers	29.934	26.7745	9.46813	33.8234		976.75					92.48	261.52	292.38	330.37
Yes	CIDET	TrofymowETAL_1995	Non-tropical	Canada				Leaf	Tsuga_heterophylla_(Raf.)_Sarg.	Western_hemlock			1	Conifers	29.807	26.6273	8.69936	34.8663		973.06					84.65	259.1	290.04	339.27
Yes	CIDET	TrofymowETAL_1995	Non-tropical	Canada				Leaf	Larix_laricina_(Du_Roi)_K._Koch	Tamarack			1	Conifers	31.8138	32.9233	9.89773	25.3652		944.56					93.49	310.98	300.5	239.59
Yes	CIDET	TrofymowETAL_1995	Non-tropical	Canada				Leaf	Larix_laricina_(Du_Roi)_K._Koch	Tamarack			1	Conifers	30.0766	29.4067	13.1991	27.3176		958.32					126.49	281.81	288.23	261.79
Yes	CIDET	TrofymowETAL_1995	Non-tropical	Canada				Leaf	Larix_occidentalis_Nutt.	Western_larch			1	Conifers	34.5361	34.0963	10.0993	21.2683		941.45					95.08	321	325.14	200.23
Yes	CIDET	TrofymowETAL_1995	Non-tropical	Canada				Leaf	Pinus_banksiana_Lamb.	Jack_pine			1	Conifers	43.5557	15.6384	7.14894	33.657		974.27					69.65	152.36	424.35	327.91
Yes	CIDET	TrofymowETAL_1995	Non-tropical	Canada				Leaf	Pinus_contorta_Dougl._var._latifolia_Engelm.	Lodgepole_pine			1	Conifers	34.4134	26.9241	17.0266	21.6359		960.44					163.53	258.59	330.52	207.8
Yes	CIDET	TrofymowETAL_1995	Non-tropical	Canada				Leaf	Pinus_ponderosa_Dougl._ex_Loud.	Ponderosa_pine			1	Conifers	32.4899	27.3796	11.5903	28.5402		970.21					112.45	265.64	315.22	276.9
Yes	CIDET	TrofymowETAL_1995	Non-tropical	Canada				Leaf	Pinus_resinosa_Sol._ex_Aiton	Red_pine			1	Conifers	40.7858	16.2484	14.2588	28.707		982.13					140.04	159.58	400.57	281.94
Yes	CIDET	TrofymowETAL_1995	Non-tropical	Canada				Leaf	Pinus_monticola_Douglas_ex_D._Don	Western_white_pine			1	Conifers	33.6562	32.5965	9.09948	24.6478		965.44					87.85	314.7	324.93	237.96
Yes	CIDET	TrofymowETAL_1995	Non-tropical	Canada				Leaf	Picea_mariana_(Mill.)_Britton,_Sterns_&_Poggenburg	Black_spruce			1	Conifers	30.4573	38.7561	14.2483	16.5383		944.11					134.52	365.9	287.55	156.14
Yes	CIDET	TrofymowETAL_1995	Non-tropical	Canada				Leaf	Picea_mariana_(Mill.)_Britton,_Sterns_&_Poggenburg	Black_spruce			1	Conifers	38.5259	20.6778	11.3689	29.4274		960.16					109.16	198.54	369.91	282.55
Yes	CIDET	TrofymowETAL_1995	Non-tropical	Canada				Leaf	Picea_engelmannii_Parry_ex_Engelm.	Engelmann_spruce			1	Conifers	29.6867	37.3465	14.3185	18.6483		924.05					132.31	345.1	274.32	172.32
Yes	CIDET	TrofymowETAL_1995	Non-tropical	Canada				Leaf	Picea_sitchensis_(Bong.)_Carr.	Sitka_spruce			1	Conifers	40.4417	20.2963	10.6279	28.6341		941.01					100.01	190.99	380.56	269.45
Yes	CIDET	TrofymowETAL_1995	Non-tropical	Canada				Leaf	Picea_glauca_(Moench)_Voss	White_spruce			1	Conifers	37.1069	31.7666	8.68906	22.4375		935.89					81.32	297.3	347.28	209.99
Yes	CIDET	TrofymowETAL_1995	Non-tropical	Canada				Leaf	Thuja_occidentalis_L.	Eastern_whitecedar			1	Conifers	39.8764	17.6581	11.9186	30.5469		946.25					112.78	167.09	377.33	289.05
Yes	CIDET	TrofymowETAL_1995	Non-tropical	Canada				Leaf	Thuja_plicata_Donn.	Western_redcedar			1	Conifers	39.1363	11.2689	11.4887	38.1062		932.92					107.18	105.13	365.11	355.5
Yes	CIDET	TrofymowETAL_1995	Non-tropical	Canada				Leaf	Taxus_brevifolia_Nutt.	Pacific_yew			1	Conifers	32.4567	16.498	9.79935	41.246		951.39					93.23	156.96	308.79	392.41
Yes	CIDET	TrofymowETAL_1995	Non-tropical	Canada				Leaf	Fagus_grandifolia_Ehrh.	American_beech			1	Broadleaves	48.4747	13.8091	7.75925	29.957		934.24					72.49	129.01	452.87	279.87
Yes	CIDET	TrofymowETAL_1995	Non-tropical	Canada				Leaf	Betula_papyrifera_Marsh.	White_birch			1	Broadleaves	31.3469	37.146	6.73971	24.7674		967.4					65.2	359.35	303.25	239.6
Yes	CIDET	TrofymowETAL_1995	Non-tropical	Canada				Leaf	Populus_tremuloides_Michx.	Trembling_aspen			1	Broadleaves	36.566	38.3866	9.47907	15.5683		922.77					87.47	354.22	337.42	143.66
Yes	CIDET	TrofymowETAL_1995	Non-tropical	Canada				Leaf	Quercus_rubra_L.	Red_oak			1	Broadleaves	40.9261	24.4777	5.839	28.7571		959.24					56.01	234.8	392.58	275.85
Yes	CIDET	TrofymowETAL_1995	Non-tropical	Canada				Leaf	Alnus_rugosa_Du_Roi	Speckled_alder			1	Broadleaves	38.4785	32.0302	8.49728	20.994		942.89					80.12	302.01	362.81	197.95
Yes	CIDET	TrofymowETAL_1995	Non-tropical	Canada				Leaf	Acer_saccharum_Marsh.	Sugar_maple			1	Broadleaves	41.5962	34.9563	9.7994	13.6481		906.79					88.86	316.98	377.19	123.76
Yes	CIDET	TrofymowETAL_1995	Non-tropical	Canada				Leaf	Gaultheria_shallon_Pursh.	Salal_Thetis			1	Broadleaves	36.2765	27.5269	8.52925	27.6674		939.59					80.14	258.64	340.85	259.96
Yes	CIDET	TrofymowETAL_1995	Non-tropical	Canada				Leaf	Tsuga_heterophylla_(Raf.)_Sarg.	Western_hemlock			1	Conifers	65.8642	2.9294	1.65946	29.5469		996.11					16.53	29.18	656.08	294.32
Yes	Independent	Berg&Ekbohm_1991	Non-tropical	Sweden				Leaf	Betula_pubescens_Ehrh.	White_birch			1	Broadleaves	36.8209	24.2455	5.73441	33.1992	BrownLeaf	994														241	57	330	16	77	44	14	49	166
Yes	Independent	Berg&Ekbohm_1991	Non-tropical	Sweden				Leaf	Betula_pubescens_Ehrh.	White_birch			1	Broadleaves	35.4458	23.8453	6.12245	34.5865	GreenLeaf	931														222	57	322	12	54	51	9	36	168
Yes	Independent	Berg&Ekbohm_1991	Non-tropical	Sweden				Leaf	Pinus_sylvestris_L.	Scots_pine			1	Conifers	44.9024	17.7874	12.256	25.0542	BrownLeaf	922														164	113	231	3	23	32	75	36	245
Yes	Independent	Berg&Ekbohm_1991	Non-tropical	Sweden				Leaf	Pinus_sylvestris_L.	Scots_pine			1	Conifers	42.757	21.028	10.514	25.7009	GreenLeaf	856														180	90	220	2	19	30	75	23	217
Yes	Independent	Berg&Ekbohm_1991	Non-tropical	Sweden				Leaf	Pinus_contorta_Dougl._var._latifolia_Engelm.	Lodgepole_pine			1	Conifers	47.6096	10.259	4.18327	37.9482	BrownLeaf	1004														103	42	381	6	34	46	90	48	254
Yes	Independent	Berg&Ekbohm_1991	Non-tropical	Sweden				Leaf	Pinus_contorta_Dougl._var._latifolia_Engelm.	Lodgepole_pine			1	Conifers	46.4575	14.8785	3.64372	35.0202	GreenLeaf	988														147	36	346	33	29	37	81	40	239
Yes	Independent	Berg&Ekbohm_1991	Non-tropical	Sweden				Leaf	Alnus_incana_(L.)_Moench	Grey_alder			1	Broadleaves	30.2005	31.8296	4.88722	33.0827		798														254	39	264	9	30	32	10	44	116
Yes	Independent	StrakováETAL_2010	Non-tropical	Central_Finland				Leaf	Pinus_sylvestris_L.	Scots_pine			1	Conifers	61.9577	5.91964	15.952	16.1707		1490.97																												142.1	28.36
Yes	Independent	StrakováETAL_2010	Non-tropical	Central_Finland				Leaf	Betula_pubescens_Ehrh.	White_birch			1	Broadleaves	48.2467	10.735	20.1448	20.8736		1284.4																												94.6	41.48
Yes	Independent	WangETAL_2014	Non-tropical	Hebei,China				Leaf	Pinus_sylvestris_L.	Scots_pine			1	Conifers	48.01	18.64		33.35		100
Yes	Independent	LiETAL_2007	Non-tropical	Jilin,China				Leaf	Pinus_koraiensis_Sieb._Et_Zucc	Korean_pine			1	Conifers	45.7754	18.0749		36.1497		935
Yes	Independent	LiETAL_2007	Non-tropical	Jilin,China				Leaf	Quercus_mongolica_Fisch._ex_Ledeb.	Mongolian_oak			1	Broadleaves	49.7404	22.8453		27.4143		963
Yes	Independent	LiETAL_2007	Non-tropical	Jilin,China				Leaf	Tilia_amurensis_Ruprecht	Zi_duan			1	Broadleaves	58.3084	20.4698		21.2218		970.7
Yes	Independent	LiETAL_2007	Non-tropical	Jilin,China				Leaf	Betula_platyphylla_Sukaczev	Japanese_white_birch			1	Broadleaves	43.4639	25.9463		30.5898		908.8
Yes	Independent	LiETAL_2007	Non-tropical	Jilin,China				Leaf	Populus_davidiana_Dode	Korean_aspen			1	Broadleaves	47.9475	24.352		27.7005		898.9
Yes	Independent	LiETAL_2007	Non-tropical	Jilin,China				Leaf	Fraxinus_mandshurica_Rupr.	Manchurian_ash			1	Broadleaves	53.3222	24.0783		22.5995		960.2
Yes	Independent	LiETAL_2007	Non-tropical	Jilin,China				Leaf	Acer_mono_Maxim.	Painted_maple			1	Broadleaves	51.652	28.1681		20.1798		956.4
Yes	Independent	LiETAL_2007	Non-tropical	Jilin,China				Leaf	Ulmus_propinqua_Koidz.	NA			1	Broadleaves	46.0367	21.943		32.0203		827.6
Yes	Independent	LiETAL_2007	Non-tropical	Jilin,China				Leaf	Juglans_mandshurica_Maxim.	Manchurian_walnut			1	Broadleaves	48.4407	30.9771		20.5821		962
Yes	Independent	Fujii&Takeda_2010	Non-tropical	Japon				Leaf	Chamaecyparis_obtusa_(Siebold_&_Zucc.)_Endl.	Japanese_cypress			1	Conifers	34.3823	18.3548	7.47951	39.7834		68.32
Yes	Independent	D’AngeloETAL_2005	Non-tropical	Kentucky,USA				Leaf	Mixed_species				1	Broadleaves	50.5495	8.39161	3.0969	37.962	EarlySuccessionForest	100.1					3.1	8.4	50.6	38
Yes	Independent	D’AngeloETAL_2005	Non-tropical	Kentucky,USA				Leaf	Mixed_species				1	Broadleaves	37.2	9.5	4	49.3	LateSuccessionForest	100	Water solubles	Hemicellulose	Cellulose	Lignin	4	9.5	37.2	49.3
Yes	Independent	AyresETAL_2009	Non-tropical	Colorado,USA				Leaf	Populus_tremuloides_Michx.	Trembling_aspen			1	Broadleaves	42.1	37.7		20.2				42.1		20.2
Yes	Independent	AyresETAL_2009	Non-tropical	Colorado,USA				Leaf	Pinus_contorta_Dougl._var._latifolia_Engelm.	lodgepole_pine			1	Conifers	59	7.2		33.8				59		33.8
Yes	Independent	AyresETAL_2009	Non-tropical	Colorado,USA				Leaf	Picea_engelmannii_Parry_ex_Engelm.	Engelmann_spruce			1	Conifers	41.1	39.7		19.2				41.1		19.2	Water_soluble	Acid_soluble	Lignin	WS_polyphenols_as_tannin	WS_polysacharides_as_glucose_equivalents	AS_polysacharides_as_glucose_equivalents
Yes	Independent	Kennedy&Hobbie_2004	Non-tropical	Nevada,USA				Leaf	Fraxinus_velutina_Torrey				1	Broadleaves	62.7894	34.3221		2.8885		141.25					32.82	55.03	4.08	4.34	11.32	33.66
Yes	Independent	GillonETAL_1999	Non-tropical	France				Leaf	Larix_decidua_Miller				1	Conifers	35.1	43.9		21		1000																					137	214	210
Yes	Independent	GillonETAL_1999	Non-tropical	France				Leaf	Pinus_brutia_Ten.				1	Conifers	38.4	45.3		16.3		1000																					150	234	163
Yes	Independent	GillonETAL_1999	Non-tropical	France				Leaf	Pinus_halepensis_Miller				1	Conifers	32.2	48.8		19		1000																					136	186	190
Yes	Independent	GillonETAL_1999	Non-tropical	France				Leaf	Pinus_pinaster_Aiton				1	Conifers	43.2	34.7		22.1		1000																					151	281	221
Yes	Independent	GillonETAL_1999	Non-tropical	France				Leaf	Pinus_pinea_L.				1	Conifers	35.9	43.6		20.5		1000																					129	230	205
Yes	Independent	GillonETAL_1999	Non-tropical	France				Leaf	Populus_alba_L.				1	Broadleaves	27.5	51		21.5		1000																					130	145	215
Yes	Independent	GillonETAL_1999	Non-tropical	France				Leaf	Populus_nigra_L.				1	Broadleaves	19.6	60		20.4		1000																					108	88	204
Yes	Independent	GillonETAL_1999	Non-tropical	France				Leaf	Juglans_regia_L.				1	Broadleaves	19.1	59.4		21.5		1000																					92	99	215
Yes	Independent	GillonETAL_1999	Non-tropical	France				Leaf	Alnus_glutinosa_(L.)_Gaertner				1	Broadleaves	28.7	41.3		30		1000																					135	152	300
Yes	Independent	GillonETAL_1999	Non-tropical	France				Leaf	Castanea_sativa_Miller				1	Broadleaves	32.3	55.6		12.1		1000																					147	176	121
Yes	Independent	GillonETAL_1999	Non-tropical	France				Leaf	Fagus_sylvatica_L.	European_beech			1	Broadleaves	42.1	30.9		27		1000																					183	238	270
Yes	Independent	GillonETAL_1999	Non-tropical	France				Leaf	Quercus_pubescens_Willd.				1	Broadleaves	36.5	40		23.5		1000																					165	200	235
Yes	Independent	GillonETAL_1999	Non-tropical	France				Leaf	Ulmus_minor_Miller				1	Broadleaves	15.5	75.4		9.1		1000																					81	74	91
Yes	Independent	GillonETAL_1999	Non-tropical	France				Leaf	Ficus_carica_L.				1	Broadleaves	20.6	66		13.4		1000																					102	104	134
Yes	Independent	GillonETAL_1999	Non-tropical	France				Leaf	Morus_alba_L.				1	Broadleaves	23.3	67.1		9.6		1000																					100	133	96
Yes	Independent	GillonETAL_1999	Non-tropical	France				Leaf	Platanus_orientalis_L.				1	Broadleaves	32.9	38.5		28.6		1000																					140	189	286
Yes	Independent	GillonETAL_1999	Non-tropical	France				Leaf	Crataegus_azarolus_L.				1	Broadleaves	19.1	70.1		10.8		1000																					104	87	108
Yes	Independent	GillonETAL_1999	Non-tropical	France				Leaf	Prunus_dulcis_(Miller)_D._A._Webb				1	Broadleaves	15.7	78		6.3		1000																					99	58	63
Yes	Independent	GillonETAL_1999	Non-tropical	France				Leaf	Cercis_siliquastrum_L.				1	Broadleaves	14.8	62.9		22.3		1000																					78	70	223
Yes	Independent	GillonETAL_1999	Non-tropical	France				Leaf	Robinia_pseudacacia_L.				1	Broadleaves	17.5	65.4		17.1		1000																					79	96	171
Yes	Independent	GillonETAL_1999	Non-tropical	France				Leaf	Pistacia_terebinthus_L.				1	Broadleaves	22.6	60.4		17		1000																					81	145	170
Yes	Independent	GillonETAL_1999	Non-tropical	France				Leaf	Acer_monspessulanum_L.				1	Broadleaves	19.6	69.6		10.8		1000																					102	94	108
Yes	Independent	GillonETAL_1999	Non-tropical	France				Leaf	Aesculus_hippocastanum_L.				1	Broadleaves	18.9	58.3		22.8		1000																					71	118	228
Yes	Independent	GillonETAL_1999	Non-tropical	France				Leaf	Fraxinus_excelsior_L.				1	Broadleaves	19.2	66.2		14.6		1000																					98	94	146
Yes	Independent	GillonETAL_1999	Non-tropical	France				Leaf	Quercus_ilex_L.				1	Broadleaves	37.8	46		16.2		1000																					166	212	162
Yes	Independent	GillonETAL_1999	Non-tropical	France				Leaf	Quercus_suber_L.				1	Broadleaves	35.5	43.7		20.8		1000																					155	200	208
Yes	Independent	GillonETAL_1999	Non-tropical	France				Leaf	Eucalyptus_camaldulensis_Dehnh.				1	Broadleaves	23.6	59.2		17.2		1000																					89	147	172
Yes	Independent	Bird&Torn_2006	Non-tropical	Nevada,USA				Leaf	Pinus_ponderosa_Dougl._ex_Loud.	Ponderosa_pine			1	Conifers	36.9074	37.8076	4.28086	21.0042		999.8					42.8	378	369	210
Yes	Independent	ValachovicETAL_2004	Non-tropical	Oregon,USA				Leaf	Alnus_rubra_Bong.	Red_alder			1	Broadleaves	34.26	37.3239	4.74704	23.669		105.75					5.02	39.47	36.23	25.03
Yes	Independent	ValachovicETAL_2004	Non-tropical	Oregon,USA				Leaf	Alnus_sinuata_(Reg.)_Rydb.	Sitka_alder			1	Broadleaves	38.5131	27.3474	5.18609	28.9533		105.86					5.49	28.95	40.77	30.65
Yes	Independent	ValachovicETAL_2004	Non-tropical	Oregon,USA				Leaf	Pseudotsuga_menziesii_(Mirb.)_Franco	Conifers_Douglas-fir			1	Conifers	39.6387	14.7578	10.9071	34.6963		100.76					10.99	14.87	39.94	34.96
Yes	Independent	ValachovicETAL_2004	Non-tropical	Oregon,USA				Leaf	Abies_amabilis_(Dougl.)_Forbes	Pacific_silver_fir			1	Conifers	29.4863	36.9414	10.2151	23.3572		101.81					10.4	37.61	30.02	23.78
Yes	Independent	ValachovicETAL_2004	Non-tropical	Oregon,USA				Leaf	Pinus_ponderosa_Dougl._ex_Loud.	Ponderosa_pine			1	Conifers	39.8339	21.8741	8.76742	29.5246		101.17					8.87	22.13	40.3	29.87
Yes	Independent	ValachovicETAL_2004	Non-tropical	Oregon,USA				Leaf	Thuja_plicata_Donn.	Western_redcedar			1	Conifers	35.9063	25.8541	10.6331	27.6066		101.57					10.8	26.26	36.47	28.04
Yes	Independent	ValachovicETAL_2004	Non-tropical	Oregon,USA				Leaf	Acer_macrophyllum_Pursh.	shrubs_Bigleaf			1	Broadleaves	44.9985	19.4082	8.68032	26.9129		102.07					8.86	19.81	45.93	27.47
Yes	Independent	ValachovicETAL_2004	Non-tropical	Oregon,USA				Leaf	Castanopsis_chrysophylla_(Dougl.)_A._DC.	Golden_chinkapin			1	Broadleaves	41.0459	30.3812	5.5132	23.0596		102.3					5.64	31.08	41.99	23.59
Yes	Independent	ValachovicETAL_2004	Non-tropical	Oregon,USA				Leaf	Quercus_garryana_Dougl.	Oregon_white			1	Broadleaves	41.9273	23.6153	4.24468	30.2127		102.01					4.33	24.09	42.77	30.82
Yes	Independent	ValachovicETAL_2004	Non-tropical	Oregon,USA				Leaf	Arbutus_menziesii_Pursh.	Pacific_madrone			1	Broadleaves	33.9668	37.9979	4.37662	23.6587		104.19					4.56	39.59	35.39	24.65
Yes	Independent	ValachovicETAL_2004	Non-tropical	Oregon,USA				Leaf	Populus_trichocarpa_T._&_G.	Poplar			1	Broadleaves	38.4562	32.0354	6.38151	23.1268		101.7					6.49	32.58	39.11	23.52
Yes	Independent	ValachovicETAL_2004	Non-tropical	Oregon,USA				Leaf	Cornus_nuttallii_Aud._ex_T._&_G.	Pacific_dogwood			1	Broadleaves	36.6623	45.551	5.81002	11.9767		106.54					6.19	48.53	39.06	12.76
Yes	Independent	ValachovicETAL_2004	Non-tropical	Oregon,USA				Leaf	Acer_circinatum_Pursh.	Vine_maple			1	Broadleaves	40.5554	35.5622	7.03503	16.8473		103.34	Lignin_%	Cellulose_%	Extractives_%		7.27	36.75	41.91	17.41
Yes	Independent	AberETAL_1984	Non-tropical	Massachusetts,USA				Leaf	Acer_saccharum_Marsh.	Sugar_maple			1	Broadleaves	43.1	44.8		12.1		100	12.1	43.1	44.8
Yes	Independent	AberETAL_1984	Non-tropical	Massachusetts,USA				Leaf	Populus_tremuloides_Michx.	Aspen			1	Broadleaves	47.5	31.1		21.4		100	21.4	47.5	31.1
Yes	Independent	AberETAL_1984	Non-tropical	Massachusetts,USA				Leaf	Quercus_alba_L.	White_oak			1	Broadleaves	47.4	32.4		20.2		100	20.2	47.4	32.4
Yes	Independent	AberETAL_1984	Non-tropical	Massachusetts,USA				Leaf	Pinus_strobus_L.	White_pine			1	Conifers	44.7	32.8		22.5		100	22.5	44.7	32.8
Yes	Independent	AberETAL_1984	Non-tropical	Massachusetts,USA				Leaf	Tsuga_canadensis_(L.)_Carrière	Hemlock			1	Conifers	41.25	37.2917		21.4583		96	20.6	39.6	35.8
Yes	Independent	AberETAL_1984	Non-tropical	Massachusetts,USA				Leaf	Quercus_rubra_L.	Red_oak			1	Broadleaves	45.2	30		24.8		100	24.8	45.2	30
Yes	Independent	AberETAL_1990	Non-tropical	Massachusetts,USA	HarvardForest			Leaf	Betula_papyrifera_Marsh.	PaperBirch			1	Broadleaves	37.6	41.7		20.7	Hardwood	100	20.7	37.6	41.7
Yes	Independent	AberETAL_1990	Non-tropical	Massachusetts,USA	HarvardForest			Leaf	Acer_rubrum_L.	RedMaple			1	Broadleaves	38	44.7		17.3	Hardwood	100	17.3	38	44.7
Yes	Independent	AberETAL_1990	Non-tropical	Massachusetts,USA	HarvardForest			Leaf	Quercus_rubra_L.	Red_oak			1	Broadleaves	42.5	30.8		26.7	Hardwood	100	26.7	42.5	30.8
Yes	Independent	AberETAL_1990	Non-tropical	Massachusetts,USA	HarvardForest			Leaf	Acer_rubrum_L.	RedMaple			1	Broadleaves	38.9	43.9		17.2	Red_Pine_Stand	100	17.2	38.9	43.9
Yes	Independent	AberETAL_1990	Non-tropical	Massachusetts,USA	HarvardForest			Leaf	Quercus_rubra_L.	Red_oak			1	Broadleaves	43.4	28.4		28.2	Red_Pine_Stand	100	28.2	43.4	28.4
Yes	Independent	AberETAL_1990	Non-tropical	Massachusetts,USA	HarvardForest			Leaf	Pinus_resinosa_Sol._ex_Aiton	Red_pine			1	Conifers	46.5	25.8		27.7	Red_Pine_Stand	100	27.7	46.5	25.8
Yes	Independent	AberETAL_1990	Non-tropical	Wisconsin,USA	Blackhawk_Island			Leaf	Acer_saccharum_Marsh.	SugarMaple			1	Broadleaves	43.1	44.8		12.1	Blackhawk_Island	100	12.1	43.1	44.8
Yes	Independent	AberETAL_1990	Non-tropical	Wisconsin,USA	Blackhawk_Island			Leaf	Populus_tremuloides_Michx.	Aspen			1	Broadleaves	47.5	31.1		21.4	Blackhawk_Island	100	21.4	47.5	31.1
Yes	Independent	AberETAL_1990	Non-tropical	Wisconsin,USA	Blackhawk_Island			Leaf	Quercus_rubra_L.	Red_oak			1	Broadleaves	45.2	30		24.8	Blackhawk_Island	100	24.8	45.2	30
Yes	Independent	AberETAL_1990	Non-tropical	Wisconsin,USA	Blackhawk_Island			Leaf	Quercus_alba_L.	WhiteOak			1	Broadleaves	47.4	32.4		20.2	Blackhawk_Island	100	20.2	47.4	32.4
Yes	Independent	AberETAL_1990	Non-tropical	Wisconsin,USA	Blackhawk_Island			Leaf	Tsuga_canadensis_(L.)_Carrière	Hemlock			1	Conifers	39.6	39.8		20.6	Blackhawk_Island	100	20.6	39.6	39.8
Yes	Independent	AberETAL_1990	Non-tropical	Wisconsin,USA	Blackhawk_Island			Leaf	Pinus_strobus_L.	WhitePine			1	Conifers	44.7	32.8		22.5	Blackhawk_Island	100	22.5	44.7	32.8
Yes	Independent	CurrieETAL_1996	Non-tropical	North-Est,USA				Leaf	Quercus_velutina_Lam.	BlackOak			1	Broadleaves	38.9	29.7		31.4		100	31.4	38.9	29.7
Yes	Independent	McLellanETAL_1991	Non-tropical	North-Est,USA				Leaf	Picea_rubens_Sarg.				1	Conifers	39.9	40.1		20		100	20	39.9	40.1		Nonstructural%	Hemicellulose%	Cellulose%	Lignin%
Yes	Independent	HendricksETAL_2002	Non-tropical	Georgia,USA				Leaf	Quercus_prinus_L.	Chestnut_oak			1	Broadleaves	24.1379	45.4187		30.4433		101.5	30.9	24.5	46.1
Yes	Independent	HendricksETAL_2002	Non-tropical	Georgia,USA				Leaf	Pinus_palustris_Mill.	Longleaf_pine			1	Conifers	33.5025	34.7208		31.7766		98.5	31.3	33	34.2
Yes	Independent	HendricksETAL_2002	Non-tropical	Georgia,USA				Leaf	Pinus_elliottii_Engelm.	Slash_pine			1	Conifers	31.7907	30.0805		38.1288		99.4	37.9	31.6	29.9
Yes	Independent	TingeyETAL_2003	Non-tropical	Oregon,USA				Leaf	Pseudotsuga_menziesii_(Mirb.)_Franco				1	Broadleaves	25.8753	41.3138	11.904	20.907		99.9667					11.9	41.3	25.8667	20.9
Yes	LIDET	LIDET	Non-tropical	Oregon,USA		44°14'	122°11'	Leaf	Acer_saccharinum_L.	Silver_Maple			1	Broadleaves	37.2131	20.169	13.0443	29.5735		100.005					37.215	20.17	13.045	29.575
Yes	LIDET	LIDET	Non-tropical	Oregon,USA		45°14'	122°11'	Leaf	Drypetes_glauca_Vahl				1	Broadleaves	47.45	14.49	14.71	23.35		100					47.45	14.49	14.71	23.35
Yes	LIDET	LIDET	Non-tropical	Oregon,USA		46°14'	122°11'	Leaf	Pinus_resinosa_Sol._ex_Aiton	Red_pine			1	Conifers	32.68	7.52	31.36	28.44		100					32.68	7.52	31.36	28.44
Yes	LIDET	LIDET	Non-tropical	Oregon,USA		47°14'	122°11'	Leaf	Pinus_strobus_L.				1	Conifers	36.62	9.61	27.48	26.29		100					36.62	9.61	27.48	26.29
Yes	LIDET	LIDET	Non-tropical	Oregon,USA		48°14'	122°11'	Leaf	Quercus_prinus_L.				1	Broadleaves	45.1345	14.2614	13.9214	26.6827		99.99					45.13	14.26	13.92	26.68
Yes	LIDET	LIDET	Non-tropical	Oregon,USA		50°14'	122°11'	Leaf	Thuja_plicata_Donn.	Western_redcedar			1	Conifers	34.974	7.9932	23.9696	33.0632		99.96					34.96	7.99	23.96	33.05
Yes	LIDET	LIDET	Non-tropical	North_Carolina,USA		17°57'	65°52'	Leaf	Acer_saccharinum_L.	Silver_Maple			1	Broadleaves	38.4038	16.2216	12.5413	32.8333		99.99					38.4	16.22	12.54	32.83
Yes	LIDET	LIDET	Non-tropical	North_Carolina,USA		17°57'	65°52'	Leaf	Drypetes_glauca_Vahl				1	Broadleaves	47.8952	11.5888	12.7987	27.7172		100.01					47.9	11.59	12.8	27.72
Yes	LIDET	LIDET	Non-tropical	North_Carolina,USA		17°57'	65°52'	Leaf	Pinus_resinosa_Sol._ex_Aiton	Red_pine			1	Conifers	38.03	9.57	16.98	35.42		100					38.03	9.57	16.98	35.42
Yes	LIDET	LIDET	Non-tropical	North_Carolina,USA		17°57'	65°52'	Leaf	Quercus_prinus_L.				1	Broadleaves	44.38	12.6	12.01	31.01		100					44.38	12.6	12.01	31.01
Yes	LIDET	LIDET	Non-tropical	North_Carolina,USA		17°57'	65°52'	Leaf	Thuja_plicata_Donn.	Western_redcedar			1	Conifers	37.9838	8.13081	18.5919	35.2935		99.99					37.98	8.13	18.59	35.29
Yes	LIDET	LIDET	Non-tropical	New_Hampshire,USA		43°56'	71°45'	Leaf	Acer_saccharinum_L.	Silver_Maple			1	Broadleaves	33.05	16.7	12.33	37.92		100					33.05	16.7	12.33	37.92
Yes	LIDET	LIDET	Non-tropical	New_Hampshire,USA		43°56'	71°45'	Leaf	Drypetes_glauca_Vahl				1	Broadleaves	42.03	11.05	14.14	32.78		100					42.03	11.05	14.14	32.78
Yes	LIDET	LIDET	Non-tropical	New_Hampshire,USA		43°56'	71°45'	Leaf	Pinus_resinosa_Sol._ex_Aiton	Red_pine			1	Conifers	35.24	8.58	18.07	38.11		100					35.24	8.58	18.07	38.11
Yes	LIDET	LIDET	Non-tropical	New_Hampshire,USA		43°56'	71°45'	Leaf	Quercus_prinus_L.				1	Broadleaves	35.5636	14.5015	14.1314	35.8036		99.99					35.56	14.5	14.13	35.8
Yes	LIDET	LIDET	Non-tropical	New_Hampshire,USA		43°56'	71°45'	Leaf	Thuja_plicata_Donn.	Western_redcedar			1	Conifers	33.96	7.99	21.72	36.33		100					33.96	7.99	21.72	36.33
Yes	LIDET	LIDET	Non-tropical	Massachusetts,USA		42°40'	72°15'	Leaf	Acer_saccharinum_L.	Silver_Maple			1	Broadleaves	35.43	20.09	13.77	30.71		100					35.43	20.09	13.77	30.71
Yes	LIDET	LIDET	Non-tropical	Massachusetts,USA		42°40'	72°15'	Leaf	Drypetes_glauca_Vahl				1	Broadleaves	44.7845	12.0112	16.3516	26.8527		99.99					44.78	12.01	16.35	26.85
Yes	LIDET	LIDET	Non-tropical	Massachusetts,USA		42°40'	72°15'	Leaf	Pinus_resinosa_Sol._ex_Aiton	Red_pine			1	Conifers	38.53	7.02	19.52	34.93		100					38.53	7.02	19.52	34.93
Yes	LIDET	LIDET	Non-tropical	Massachusetts,USA		42°40'	72°15'	Leaf	Quercus_prinus_L.				1	Broadleaves	39.944	15.1415	14.9115	30.003		99.99					39.94	15.14	14.91	30
Yes	LIDET	LIDET	Non-tropical	Massachusetts,USA		42°40'	72°15'	Leaf	Thuja_plicata_Donn.	Western_redcedar			1	Conifers	35.02	7.04	24.63	33.31		100					35.02	7.04	24.63	33.31
Yes	LIDET	LIDET	Non-tropical	Michigan,USA		42°24'	85°24'	Leaf	Acer_saccharinum_L.	Silver_Maple			1	Broadleaves	44.82	20.945	19.955	14.28		100					44.82	20.945	19.955	14.28
Yes	LIDET	LIDET	Non-tropical	Michigan,USA		42°24'	85°24'	Leaf	Pinus_resinosa_Sol._ex_Aiton	Red_pine			1	Conifers	42.47	10.5	25.2	21.83		100					42.47	10.5	25.2	21.83
Yes	LIDET	LIDET	Non-tropical	Michigan,USA		42°24'	85°24'	Leaf	Quercus_prinus_L.				1	Broadleaves	38.09	13.96	39.53	8.42		100					38.09	13.96	39.53	8.42
Yes	LIDET	LIDET	Non-tropical	Michigan,USA		42°24'	85°24'	Leaf	Thuja_plicata_Donn.	Western_redcedar			1	Conifers	45.81	14.84	27.68	11.67		100					45.81	14.84	27.68	11.67
No	LIDET	LIDET	Tropical	Puerto_Rico		18°19'	65°49'	Leaf	Acer_saccharinum_L.	Silver_Maple			1	Broadleaves	39.56	12.25	11.79	36.4		100					39.56	12.25	11.79	36.4
No	LIDET	LIDET	Tropical	Puerto_Rico		18°19'	65°49'	Leaf	Pinus_resinosa_Sol._ex_Aiton	Red_pine			1	Conifers	42.35	6.41	14.89	36.35		100					42.35	6.41	14.89	36.35
No	LIDET	LIDET	Tropical	Puerto_Rico		18°19'	65°49'	Leaf	Thuja_plicata_Donn.	Western_redcedar			1	Conifers	37.6938	5.63056	16.3516	40.324		99.99					37.69	5.63	16.35	40.32
Yes	LIDET	LIDET	Non-tropical	Wisconsin,USA		46°00'	89°40'	Leaf	Acer_saccharinum_L.	Silver_Maple			1	Broadleaves	35.3665	20.208	12.0988	32.3268		100.01					35.37	20.21	12.1	32.33
Yes	LIDET	LIDET	Non-tropical	Wisconsin,USA		46°00'	89°40'	Leaf	Drypetes_glauca_Vahl				1	Broadleaves	48.3148	13.1113	16.6017	21.9722		99.99					48.31	13.11	16.6	21.97
Yes	LIDET	LIDET	Non-tropical	Wisconsin,USA		46°00'	89°40'	Leaf	Pinus_resinosa_Sol._ex_Aiton	Red_pine			1	Conifers	34.69	8.31	19.88	37.12		100					34.69	8.31	19.88	37.12
Yes	LIDET	LIDET	Non-tropical	Wisconsin,USA		46°00'	89°40'	Leaf	Quercus_prinus_L.				1	Broadleaves	39.36	14.37	17.66	28.61		100					39.36	14.37	17.66	28.61
Yes	LIDET	LIDET	Non-tropical	Wisconsin,USA		46°00'	89°40'	Leaf	Thuja_plicata_Donn.	Western_redcedar			1	Conifers	33.59	9.03	24.18	33.2		100					33.59	9.03	24.18	33.2
Yes	LIDET	LIDET	Non-tropical	Washington,USA		47°50'	122°53'	Leaf	Acer_saccharinum_L.	Silver_Maple			1	Broadleaves	38.14	13.32	13.57	34.97		100					38.14	13.32	13.57	34.97
Yes	LIDET	LIDET	Non-tropical	Washington,USA		47°50'	122°53'	Leaf	Drypetes_glauca_Vahl				1	Broadleaves	42.0458	10.8789	16.6183	30.457		100.01					42.05	10.88	16.62	30.46
Yes	LIDET	LIDET	Non-tropical	Washington,USA		47°50'	122°53'	Leaf	Pinus_resinosa_Sol._ex_Aiton	Red_pine			1	Conifers	35.5564	7.88921	17.4283	39.1261		100.01					35.56	7.89	17.43	39.13
Yes	LIDET	LIDET	Non-tropical	Washington,USA		47°50'	122°53'	Leaf	Quercus_prinus_L.				1	Broadleaves	39.05	9.87	16.06	35.02		100					39.05	9.87	16.06	35.02
Yes	LIDET	LIDET	Non-tropical	Washington,USA		47°50'	122°53'	Leaf	Thuja_plicata_Donn.	Western_redcedar			1	Conifers	38.91	6.47	15.98	38.64		100					38.91	6.47	15.98	38.64
Yes	LIDET	LIDET	Non-tropical	California,USA		29°45'	82°30'	Leaf	Acer_saccharinum_L.	Silver_Maple			1	Broadleaves	33.95	30.58	12.46	23.01		100					33.95	30.58	12.46	23.01
Yes	LIDET	LIDET	Non-tropical	California,USA		29°45'	82°30'	Leaf	Drypetes_glauca_Vahl				1	Broadleaves	45.7754	21.7378	14.4486	18.0382		100.01					45.78	21.74	14.45	18.04
Yes	LIDET	LIDET	Non-tropical	California,USA		29°45'	82°30'	Leaf	Pinus_resinosa_Sol._ex_Aiton	Red_pine			1	Conifers	39.664	12.2212	20.8321	27.2827		99.99					39.66	12.22	20.83	27.28
Yes	LIDET	LIDET	Non-tropical	California,USA		29°45'	82°30'	Leaf	Populus_trichocarpa_T._&_G.				1	Broadleaves	38.39	15.09	17.51	29.01		100					38.39	15.09	17.51	29.01
Yes	LIDET	LIDET	Non-tropical	California,USA		29°45'	82°30'	Leaf	Quercus_prinus_L.				1	Broadleaves	38.67	17.72	14.16	29.45		100					38.67	17.72	14.16	29.45
Yes	LIDET	LIDET	Non-tropical	California,USA		29°45'	82°30'	Leaf	Thuja_plicata_Donn.	Western_redcedar			1	Conifers	37.4837	13.0313	20.5421	28.9429		99.99					37.48	13.03	20.54	28.94
Yes	LIDET	LIDET	Non-tropical	Florida,USA		29°45'	82°30'	Leaf	Acer_saccharinum_L.	Silver_Maple			1	Broadleaves	40.38	17.2	12.14	30.28		100					40.38	17.2	12.14	30.28
Yes	LIDET	LIDET	Non-tropical	Florida,USA		29°45'	82°30'	Leaf	Drypetes_glauca_Vahl				1	Broadleaves	48.23	12.14	15.56	24.07		100					48.23	12.14	15.56	24.07
Yes	LIDET	LIDET	Non-tropical	Florida,USA		29°45'	82°30'	Leaf	Pinus_elliottii_Engelm.				1	Conifers	40.97	7.81	16.93	34.29		100					40.97	7.81	16.93	34.29
Yes	LIDET	LIDET	Non-tropical	Florida,USA		29°45'	82°30'	Leaf	Pinus_resinosa_Sol._ex_Aiton	Red_pine			1	Conifers	39.46	8.52	15.59	36.43		100					39.46	8.52	15.59	36.43
Yes	LIDET	LIDET	Non-tropical	Florida,USA		29°45'	82°30'	Leaf	Quercus_prinus_L.				1	Broadleaves	39.2	12.49	14.05	34.26		100					39.2	12.49	14.05	34.26
Yes	LIDET	LIDET	Non-tropical	Florida,USA		29°45'	82°30'	Leaf	Thuja_plicata_Donn.	Western_redcedar			1	Conifers	39.2761	6.94931	18.2082	35.5664		100.01					39.28	6.95	18.21	35.57
Yes	Independent	Stump&Binkley_1993	Non-tropical	RockyMountain,USA				Leaf	Populus_tremuloides_Michx.	Aspen			1	Broadleaves	40.63	39.96		19.41		1000	194.1	406.3
Yes	Independent	Stump&Binkley_1995	Non-tropical	RockyMountain,USA				Leaf	Pinus_contorta_Dougl._var._latifolia_Engelm.	Lodgepole_pine			1	Conifers	36.99	37.72		25.29		1000	252.9	369.9
Yes	Independent	Stump&Binkley_1997	Non-tropical	RockyMountain,USA				Leaf	Picea_engelmannii_Parry_ex_Engelm.	Engelmann_spruce			1	Conifers	49.13	24.73		26.14		1000	261.4	491.3
Yes	Independent	Stump&Binkley_1999	Non-tropical	RockyMountain,USA				Leaf	Abies_lasiocarpa_(Hook.)_Nutt.	Subalpine_fir			1	Conifers	45.66	27.77		26.57		1000	265.7	456.6
[truncated: 39 more columns]

## Sheet: Roots
IsIncluded	Network	Publication	Climate	Region	SiteName	Latitude	Longititude	Organ	Species	CommonSpeciesName	Genus	Familly	IsTree	FunctionalType	percA	percW	percE	percN	Note	Total	CellSoluble	Cellulose	Hemicellulose	Lignin	Non-polarExtractable	WaterSolubleExtractable	AcidSoluble	KlasonLignin	Lignin	NonpolarExtractives	Tannins	WaterSolubleCarbohydrates	AcidSolubleCarbohydrates	Water	Ethanol	Lignin	Rhamnan	Xylan	Galactan	Mannan	Araban	Glucans	NonpolarExtractables	WaterSoluble_sugars	WaterSoluble_phenols	AcidSoluble	Lignin	NPE	acetone
Yes	Independent	HoubbieETAL_2010	Non-tropical	Poland				FineRoot	Abies_alba_Mill.	Silver_fir			1	Conifers	25.26	40.62		34.12		1000	406.2	174.3	78.3	341.2
Yes	Independent	HoubbieETAL_2010	Non-tropical	Poland				FineRoot	Acer_platanoides_L.	Norway_maple			1	Broadleaves	36.86	27.36		35.78		1000	273.6	262.2	106.4	357.8
Yes	Independent	HoubbieETAL_2010	Non-tropical	Poland				FineRoot	Acer_pseudoplatanus_L.	Sycamore_maple			1	Broadleaves	30.55	26.82		42.63		1000	268.2	228.5	77	426.3
Yes	Independent	HoubbieETAL_2010	Non-tropical	Poland				FineRoot	Carpinus_betula_L.	European_hornbeam			1	Broadleaves	30.2286	34.8807		34.8907		1001.7	349.4	217.9	84.9	349.5
Yes	Independent	HoubbieETAL_2010	Non-tropical	Poland				FineRoot	Fagus_sylvatica_L.	European_beech			1	Broadleaves	31.5468	27.3973		41.0559		1000.1	274	222.6	92.9	410.6
Yes	Independent	HoubbieETAL_2010	Non-tropical	Poland				FineRoot	Larix_decidua_Miller				1	Conifers	32.5307	34.3791		33.0902		1000.9	344.1	235	90.6	331.2
Yes	Independent	HoubbieETAL_2010	Non-tropical	Poland				FineRoot	Picea_abies_(L.)_H._Karst	Norway_spruce			1	Conifers	29.2878	36.38		34.3322		1001.1	364.2	205.4	87.8	343.7
Yes	Independent	HoubbieETAL_2010	Non-tropical	Poland				FineRoot	Pseudotsuga_menziesii_(Mirb.)_Franco				1	Conifers	26.5008	34.6119		38.8872		1001.1	346.5	200	65.3	389.3
Yes	Independent	HoubbieETAL_2010	Non-tropical	Poland				FineRoot	Quercus_robur_L.	English_oak			1	Broadleaves	28.6085	34.522		36.8694		1001.1	345.6	171.7	114.7	369.1
Yes	Independent	HoubbieETAL_2010	Non-tropical	Poland				FineRoot	Quercus_rubra_L.	Red_oak			1	Broadleaves	22.647	29.5938		47.7593		1001.9	296.5	160.9	66	478.5
Yes	Independent	HoubbieETAL_2010	Non-tropical	Poland				FineRoot	Tilia_cordata_Mill.	Small-leaved_Lime			1	Broadleaves	36.082	26.9565		36.9615		1000.5	269.7	255.7	105.3	369.8
No		Hobbie_1996		Alaska_USA				FineRoot	Carex_bigelowii_Torr._ex_Schwein.	Bigelow's_sedge			0	Herb	65.0926	13.9703	3.79002	17.1471		81.53																							3.09	9.82	1.57	53.07	13.98
No		Hobbie_1996		Alaska_USA				FineRoot	Eriophorum_vaginatum_L.	Hare's-tail_cottongrass			0	Herb	55.2446	18.4279	5.5323	20.7952		76.46																							4.23	12.59	1.5	42.24	15.9
No		Hobbie_1996		Alaska_USA				FineRoot	Betula_nana_L.	Dwarf_birch			0	Shrub	29.8838	19.1193	10.0795	40.9174		81.75																							8.24	12.54	3.09	24.43	33.45
No		Hobbie_1996		Alaska_USA				FineRoot	Ledum_palustre_L.	Marsh_Labrador_tea			0	Shrub	34.3017	7.05736	13.9277	44.7132		80.2																							11.17	3.57	2.09	27.51	35.86
No		Hobbie_1996		Alaska_USA				FineRoot	Vaccnium_vitis_idaea_L.	Lingonberry			0	Shrub	48.907	6.59634	4.37214	40.1246		78.68																							3.44	3.95	1.24	38.48	31.57
No-coarseRoot	Independent	GuoETAL_2004	Non-tropical	Georgia,USA				Root_d>30mm	Pinus_palustris_Mill.	Longleaf_pine			1	Conifers	38.6014	35.964		25.4346		1001
Yes	Independent	WangETAL_2014	Non-tropical	Hebei,China				Root,d<0.5mm	Pinus_sylvestris_L.	Scots_pine			1	Conifers	56.2756	10.5911		33.1333		99.99
Yes	Independent	WangETAL_2014	Non-tropical	Hebei,China				Root,d=0.5_1mm	Pinus_sylvestris_L.	Scots_pine			1	Conifers	49.695	7.49075		42.8143		99.99
Yes	Independent	WangETAL_2014	Non-tropical	Hebei,China				Root,d=1_2mm	Pinus_sylvestris_L.	Scots_pine			1	Conifers	47.6652	10.7789		41.5558		100.01
Yes	Independent	WangETAL_2014	Non-tropical	Hebei,China				Root,d=2_5mm	Pinus_sylvestris_L.	Scots_pine			1	Conifers	51.2402	12.5325		36.2272		99.98
No-coarseRoot	Independent	WangETAL_2014	Non-tropical	Hebei,China				Root,d>5mm	Pinus_sylvestris_L.	Scots_pine			1	Conifers	56.3	9.71		33.99		100
Yes	Independent	Fujii&Takeda_2010	Non-tropical	Japon				FineRoot	Chamaecyparis_obtusa_(Siebold_&_Zucc.)_Endl.	Japanese_cypress			1	Conifers	29.532	8.59089	7.03923	54.8379		79.27					Non-polar_extractives	Water_soluble	Acid soluble	AcidInsoluble_lignin
Yes	Independent	AulenETAL_2011	Non-tropical	Quebec,Canada				TotalRoot	Betula_alleghaniensis_Brit.				1	Broadleaves	39.1339	28.0228		32.8433		999.9	280.2	164.2	227.1	328.4
Yes	Independent	AulenETAL_2011	Non-tropical	Quebec,Canada				TotalRoot	Fraxinus_americana_L.	American_ash			1	Broadleaves	46.24	35.17		18.59		1000	351.7	229.6	232.8	185.9
Yes	Independent	AulenETAL_2011	Non-tropical	Quebec,Canada				TotalRoot	Juglans_cinerea_L.	White_walnut			1	Broadleaves	36.85	47.54		15.61		1000	475.4	186.5	182	156.1
Yes	Independent	AulenETAL_2011	Non-tropical	Quebec,Canada				TotalRoot	Juglans_nigra_L.	Black_walnut			1	Broadleaves	42.07	46.4		11.53		1000	464	210.2	210.5	115.3
Yes	Independent	AulenETAL_2011	Non-tropical	Quebec,Canada				TotalRoot	Larix_×_marschlinsii_Coaz.	Hybrid_Larch(L._kaempferi_×_L._russica)			1	Conifers	40.6959	27.0773		32.2268		1000.1	270.8	143.6	263.4	322.3
Yes	Independent	AulenETAL_2011	Non-tropical	Quebec,Canada				TotalRoot	Picea_abies_(L.)_H._Karst	Norway_spruce			1	Conifers	44.74	24.72		30.54		1000	247.2	178.3	269.1	305.4
Yes	Independent	AulenETAL_2011	Non-tropical	Quebec,Canada				TotalRoot	Pinus_strobus_L.				1	Conifers	39.59	28.27		32.14		1000	282.7	153.4	242.5	321.4
Yes	Independent	AulenETAL_2011	Non-tropical	Quebec,Canada				TotalRoot	Populus_×_canadensis_Moench	Hybrid_Black_Poplar			1	Broadleaves	51.45	23.81		24.74		1000	238.1	191.8	322.7	247.4
Yes	Independent	AulenETAL_2011	Non-tropical	Quebec,Canada				TotalRoot	Quercus_macrocarpa_Michx.	Bur_oak			1	Broadleaves	41.56	38.03		20.41		1000	380.3	182.9	232.7	204.1
Yes	Independent	AulenETAL_2011	Non-tropical	Quebec,Canada				TotalRoot	Quercus_rubra_L.	Red_oak			1	Broadleaves	50.3	29.14		20.56		1000	291.4	214	289	205.6
No		AulenETAL_2011		Quebec,Canada				TotalRoot	Agropyron_cristatum_(L.)_Gaertn.				0	Herb	52.2794	33.2394		14.4812		993.7	330.3	295.1	224.4	143.9
No		AulenETAL_2011		Quebec,Canada				TotalRoot	Bromus_inermis_Leyss.	Bunchgrass			0	Herb	47.7841	36.8606		15.3552		995.1	366.8	266.5	209	152.8
No		AulenETAL_2011		Quebec,Canada				TotalRoot	Festuca_rubra_L.	Red_fescue			0	Herb	47.6371	33.1929		19.1699		973.4	323.1	252.9	210.8	186.6
No		AulenETAL_2011		Quebec,Canada				TotalRoot	Lolium_multiﬂorum_Lam.	Italian_rye-grass			0	Herb	56.1935	32.2514		11.5551		973.6	314	319.3	227.8	112.5
No		AulenETAL_2011		Quebec,Canada				TotalRoot	Poa_pratensis_L.	Kentucky_bluegrass			0	Herb	49.6215	35.9645		14.4141		990.7	356.3	282.7	208.9	142.8
No		AulenETAL_2011		Quebec,Canada				TotalRoot	Phleum_pratense_L.	Timothy-grass			0	Herb	47.1323	35.5192		17.3485		985.1	349.9	253.6	210.7	170.9
No		AulenETAL_2011		Quebec,Canada				TotalRoot	Trifolium_pratense_L.	Red_clover			0	Herb	40.9162	40.7786		18.3052		1017.2	414.8	225.3	190.9	186.2
Yes	Independent	AulenETAL_2011	Non-tropical	Quebec,Canada				AbsorbingRoot	Betula_alleghaniensis_Brit.				1	Broadleaves	33.2324	36.6141		30.1534		958.1	350.8	180.5	137.9	288.9
Yes	Independent	AulenETAL_2011	Non-tropical	Quebec,Canada				AbsorbingRoot	Fraxinus_americana_L.	American_ash			1	Broadleaves	41.9536	37.2174		20.8291		981.8	365.4	238.9	173	204.5
Yes	Independent	AulenETAL_2011	Non-tropical	Quebec,Canada				AbsorbingRoot	Juglans_cinerea_L.	White_walnut			1	Broadleaves	32.8062	50.1115		17.0823		986.4	494.3	198.1	125.5	168.5
Yes	Independent	AulenETAL_2011	Non-tropical	Quebec,Canada				AbsorbingRoot	Juglans_nigra_L.	Black_walnut			1	Broadleaves	31.8632	50.7929		17.3439		1009	512.5	184.1	137.4	175
Yes	Independent	AulenETAL_2011	Non-tropical	Quebec,Canada				AbsorbingRoot	Larix_×_marschlinsii_Coaz.	Hybrid_Larch(L._kaempferi_×_L._russica)			1	Conifers	34.9953	31.8101		33.1945		960.7	305.6	176.5	159.7	318.9
Yes	Independent	AulenETAL_2011	Non-tropical	Quebec,Canada				AbsorbingRoot	Picea_abies_(L.)_H._Karst	Norway_spruce			1	Conifers	35.7965	32.9388		31.2647		937.8	308.9	176.4	159.3	293.2
Yes	Independent	AulenETAL_2011	Non-tropical	Quebec,Canada				AbsorbingRoot	Pinus_strobus_L.				1	Conifers	38.4896	34.3431		27.1673		930.9	319.7	200.5	157.8	252.9
Yes	Independent	AulenETAL_2011	Non-tropical	Quebec,Canada				AbsorbingRoot	Populus_×_canadensis_Moench	Hybrid_Black_Poplar			1	Broadleaves	36.589	33.2388		30.1722		952.2	316.5	159.1	189.3	287.3
Yes	Independent	AulenETAL_2011	Non-tropical	Quebec,Canada				AbsorbingRoot	Quercus_macrocarpa_Michx.	Bur_oak			1	Broadleaves	27.9688	41.0909		30.9403		962.5	395.5	136.2	133	297.8
Yes	Independent	AulenETAL_2011	Non-tropical	Quebec,Canada				AbsorbingRoot	Quercus_rubra_L.	Red_oak			1	Broadleaves	24.0588	41.3736		34.5676		966.8	400	109.2	123.4	334.2
Yes	Independent	Bird&Torn_2006	Non-tropical	Nevada,USA				FineRoot,d<2mm	Pinus_ponderosa_Dougl._ex_Loud.	Ponderosa_pine			1	Conifers	46.8672	21.0852	4.66673	27.3808		1000.7					46.7	211	469	274
Yes	Independent	AberETAL_1990	Non-tropical	Wisconsin,USA	Blackhawk_Island			Root	Pinus_strobus_L.	WhitePine			1	Conifers	49.5	25.2		25.3	Blackhawk_Island	100	25.3	49.5	25.2
Yes	Independent	AberETAL_1990	Non-tropical	Wisconsin,USA	Blackhawk_Island			Root	Acer_saccharum_Marsh.	SugarMaple			1	Broadleaves	47.7	18.5		33.8	Blackhawk_Island	100	33.8	47.7	18.5
Yes	Independent	FahayETAL_1998	Non-tropical	NewHampshire,USA				FineRoot,d=0.6_1.0mm	Acer_saccharum_Marsh.	Sugar_maple			1	Broadleaves	30.9375	35.9375		33.125		96					34.5	7.2	22.5	31.8
Yes	Independent	FahayETAL_1998	Non-tropical	NewHampshire,USA				FineRoot,d=1.0_2.5mm	Acer_saccharum_Marsh.	Sugar_maple			1	Broadleaves	43.8315	26.3791		29.7894		99.7					26.3	10.5	33.2	29.7
Yes	Independent	FahayETAL_1998	Non-tropical	NewHampshire,USA				FineRoot,d=0.6_1.0mm	Betula_alleghaniensis_Brit.	Yellow_birch			1	Broadleaves	33.7715	38.9282		27.3003		98.9					38.5	12.9	20.5	27
Yes	Independent	FahayETAL_1998	Non-tropical	NewHampshire,USA				FineRoot,d=1.0_2.5mm	Betula_alleghaniensis_Brit.	Yellow_birch			1	Broadleaves	36.6142	38.6811		24.7047		101.6					39.3	13.4	23.8	25.1
Yes	Independent	FahayETAL_1998	Non-tropical	NewHampshire,USA				FineRoot,d=0.6_1.0mm	Fagus_grandifolia_Ehrh.	American_beech			1	Broadleaves	35.5355	37.5375		26.9269		99.9					37.5	11.9	23.6	26.9
Yes	Independent	FahayETAL_1998	Non-tropical	NewHampshire,USA				FineRoot,d=1.0_2.5mm	Fagus_grandifolia_Ehrh.	American_beech			1	Broadleaves	44.334	31.2127		24.4533		100.6					31.4	13.5	31.1	24.6
Yes	Independent	FahayETAL_1998	Non-tropical	NewHampshire,USA				FineRoot,d=0.6_1.0mm	Picea_rubens_Sarg.	Red_spruce			1	Conifers	26.3265	47.3469		26.3265		98					46.4	8	17.8	25.8
Yes	Independent	FahayETAL_1998	Non-tropical	NewHampshire,USA				FineRoot,d=1.0_2.5mm	Picea_rubens_Sarg.	Red_spruce			1	Conifers	30.6693	45.954		23.3766		100.1	Acid-insoluble	Acid-soluble	Extractable		46	6.9	23.8	23.4
Yes	Independent	TingeyETAL_2003	Non-tropical	Oregon,USA				Root,d=0_1mm	Pseudotsuga_menziesii_(Mirb.)_Franco				1	Broadleaves	43.4	13	8.2	35.4		100					8.2	13	43.4	35.4
Yes	Independent	TingeyETAL_2003	Non-tropical	Oregon,USA				Root,d=1_2mm	Pseudotsuga_menziesii_(Mirb.)_Franco				1	Broadleaves	39.96	20.7792	8.59141	30.6693		100.1					8.6	20.8	40	30.7
No-coarseRoot	Independent	TingeyETAL_2003	Non-tropical	Oregon,USA				Root,d=2_10mm	Pseudotsuga_menziesii_(Mirb.)_Franco				1	Broadleaves	45.4545	19.0809	7.09291	28.3716		100.1	%HC.	%Cellu.	%Lig.		7.1	19.1	45.5	28.4
No-coarseRoot	LIDET	LIDET	Non-tropical	New_Hampshire,USA		43°56'	71°45'	CoarseRoot	Gonystylus_bancanus_(Miq.)_Kurz				1	Broadleaves	64.18	4.08	5.64	26.1		100					64.18	4.08	5.64	26.1
No-coarseRoot	LIDET	LIDET	Non-tropical	Massachusetts,USA		42°40'	72°15'	CoarseRoot	Gonystylus_bancanus_(Miq.)_Kurz				1	Broadleaves	66.71	6.56	6.68	20.05		100					66.71	6.56	6.68	20.05
No-coarseRoot	LIDET	LIDET	Non-tropical	Michigan,USA		42°24'	85°24'	CoarseRoot	Gonystylus_bancanus_(Miq.)_Kurz				1	Broadleaves	68.7331	3.91961	6.61934	20.7279		100.01					68.74	3.92	6.62	20.73
No-coarseRoot	LIDET	LIDET	Non-tropical	Kansas,USA		39°05'	96°35'	CoarseRoot	Gonystylus_bancanus_(Miq.)_Kurz				1	Broadleaves	64.7235	3.91961	6.18938	25.1675		100.01					64.73	3.92	6.19	25.17
No-coarseRoot	LIDET	LIDET	Tropical	Puerto_Rico		18°19'	65°49'	CoarseRoot	Gonystylus_bancanus_(Miq.)_Kurz				1	Broadleaves	68.73	3.87667	6.08	21.3133		100					68.73	3.87667	6.08	21.3133
No	LIDET	LIDET		Oregon,USA		50°14'	122°11'	FineRoot	Andropogon_gerardii_Vitman.				0	Herb	67.8668	9.56096	9.64096	12.9313		99.99					67.86	9.56	9.64	12.93
Yes	LIDET	LIDET	Non-tropical	Oregon,USA		50°14'	122°11'	FineRoot	Drypetes_glauca_Vahl				1	Broadleaves	60.77	6.38	12.15	20.7		100					60.77	6.38	12.15	20.7
Yes	LIDET	LIDET	Non-tropical	Oregon,USA		50°14'	122°11'	FineRoot	Pinus_elliottii_Engelm.				1	Conifers	34.89	9.35	13.09	42.67		100					34.89	9.35	13.09	42.67
Yes	LIDET	LIDET	Non-tropical	North_Carolina,USA		17°57'	65°52'	FineRoot	Drypetes_glauca_Vahl				1	Broadleaves	54.9955	7.54075	12.4012	25.0625		99.99					54.99	7.54	12.4	25.06
Yes	LIDET	LIDET	Non-tropical	North_Carolina,USA		17°57'	65°52'	FineRoot	Pinus_elliottii_Engelm.				1	Conifers	34.87	6.84	11.76	46.53		100					34.87	6.84	11.76	46.53
No	LIDET	LIDET		New_Hampshire,USA		43°56'	71°45'	FineRoot	Andropogon_gerardii_Vitman.				0	Herb	65.04	7.4	9.63	17.93		100					65.04	7.4	9.63	17.93
Yes	LIDET	LIDET	Non-tropical	New_Hampshire,USA		43°56'	71°45'	FineRoot	Drypetes_glauca_Vahl				1	Broadleaves	52.0752	5.33053	12.0912	30.5031		99.99					52.07	5.33	12.09	30.5
Yes	LIDET	LIDET	Non-tropical	New_Hampshire,USA		43°56'	71°45'	FineRoot	Pinus_elliottii_Engelm.				1	Conifers	28.53	6.79	12.53	52.15		100					28.53	6.79	12.53	52.15
No	LIDET	LIDET		Massachusetts,USA		42°40'	72°15'	FineRoot	Andropogon_gerardii_Vitman.				0	Herb	67.5468	8.59086	14.1914	9.67097		99.99					67.54	8.59	14.19	9.67
Yes	LIDET	LIDET	Non-tropical	Massachusetts,USA		42°40'	72°15'	FineRoot	Drypetes_glauca_Vahl				1	Broadleaves	60.476	4.88049	11.5812	23.0623		99.99					60.47	4.88	11.58	23.06
Yes	LIDET	LIDET	Non-tropical	Massachusetts,USA		42°40'	72°15'	FineRoot	Pinus_elliottii_Engelm.				1	Conifers	37.27	7.01	12.01	43.71		100					37.27	7.01	12.01	43.71
Yes	LIDET	LIDET	Non-tropical	Michigan,USA		42°24'	85°24'	FineRoot	Drypetes_glauca_Vahl				1	Broadleaves	58.09	7.94	25.1	8.87		100					58.09	7.94	25.1	8.87
Yes	LIDET	LIDET	Non-tropical	Michigan,USA		42°24'	85°24'	FineRoot	Pinus_elliottii_Engelm.				1	Conifers	37.43	11.14	17.46	33.97		100					37.43	11.14	17.46	33.97
Yes	LIDET	LIDET	Non-tropical	Wisconsin,USA		46°00'	89°40'	FineRoot	Drypetes_glauca_Vahl				1	Broadleaves	59.11	5.34	12.83	22.72		100					59.11	5.34	12.83	22.72
Yes	LIDET	LIDET	Non-tropical	Wisconsin,USA		46°00'	89°40'	FineRoot	Pinus_elliottii_Engelm.				1	Conifers	38.4038	6.9607	12.3412	42.2942		99.99					38.4	6.96	12.34	42.29
No	LIDET	LIDET		Washington,USA		47°50'	122°53'	FineRoot	Andropogon_gerardii_Vitman.				0	Herb	63.17	11.31	9.59	15.93		100					63.17	11.31	9.59	15.93
Yes	LIDET	LIDET	Non-tropical	Washington,USA		47°50'	122°53'	FineRoot	Drypetes_glauca_Vahl				1	Broadleaves	54.7655	5.85059	12.5113	26.8727		99.99					54.76	5.85	12.51	26.87
Yes	LIDET	LIDET	Non-tropical	Washington,USA		47°50'	122°53'	FineRoot	Pinus_elliottii_Engelm.				1	Conifers	31.93	7.34	11.79	48.94		100					31.93	7.34	11.79	48.94
No	LIDET	LIDET		California,USA		29°45'	82°30'	FineRoot	Andropogon_gerardii_Vitman.				0	Herb	62.17	8.34	9.51	19.98		100					62.17	8.34	9.51	19.98
Yes	LIDET	LIDET	Non-tropical	California,USA		29°45'	82°30'	FineRoot	Drypetes_glauca_Vahl				1	Broadleaves	49.65	7.23	11.56	31.56		100					49.65	7.23	11.56	31.56
Yes	LIDET	LIDET	Non-tropical	California,USA		29°45'	82°30'	FineRoot	Pinus_elliottii_Engelm.				1	Conifers	32.47	7.81	12.26	47.46		100					32.47	7.81	12.26	47.46
No	LIDET	LIDET		Florida,USA		29°45'	82°30'	FineRoot	Andropogon_gerardii_Vitman.				0	Herb	71.79	15.88	11.58	0.75		100					71.79	15.88	11.58	0.75
Yes	LIDET	LIDET	Non-tropical	Florida,USA		29°45'	82°30'	FineRoot	Drypetes_glauca_Vahl				1	Broadleaves	49.71	5.85	11.87	32.57		100					49.71	5.85	11.87	32.57
Yes	LIDET	LIDET	Non-tropical	Florida,USA		29°45'	82°30'	FineRoot	Pinus_elliottii_Engelm.				1	Conifers	36.99	7.89	11.46	43.66		100					36.99	7.89	11.46	43.66
Yes	Independent	HendricksETAL_2000	Non-tropical	Massachusetts,USA	Harvard Forest			FineRoot,d<1mm	Pinus_resinosa_Sol._ex_Aiton	Red_pine			1	Conifers	30.9	21.8		47.3	SoilDepth_Control_Organic–10_	100					30.9	21.8		47.3
Yes	Independent	HendricksETAL_2000	Non-tropical	Massachusetts,USA	Harvard Forest			FineRoot,d<1mm	Pinus_resinosa_Sol._ex_Aiton	Red_pine			1	Conifers	30.6	22.2		47.2	SoilDepth_Low_N_Organic–10	100					30.6	22.2		47.2
Yes	Independent	HendricksETAL_2000	Non-tropical	Massachusetts,USA	Harvard Forest			FineRoot,d<1mm	Pinus_resinosa_Sol._ex_Aiton	Red_pine			1	Conifers	30.8691	21.5784		47.5524	SoilDepth_High_N_Organic–10	100.1					30.9	21.6		47.6
Yes	Independent	HendricksETAL_2000	Non-tropical	Massachusetts,USA	Harvard Forest			FineRoot,d<1mm	Mixed_species	Hardwood			1	Broadleaves	30.1	19.9		50	SoilDepth_Control_Organic–10_	100					30.1	19.9		50
Yes	Independent	HendricksETAL_2000	Non-tropical	Massachusetts,USA	Harvard Forest			FineRoot,d<1mm	Mixed_species	Hardwood			1	Broadleaves	29.1	18.6		52.3	SoilDepth_Low_N_Organic–10	100					29.1	18.6		52.3
Yes	Independent	HendricksETAL_2000	Non-tropical	Massachusetts,USA	Harvard Forest			FineRoot,d<1mm	Mixed_species	Hardwood			1	Broadleaves	31.9756	16.1914		51.833	SoilDepth_High_N_Organic–10	98.2					31.4	15.9		50.9
Yes	Independent	HendricksETAL_2000	Non-tropical	Wisconsin,USA	U.W.Arboretum			FineRoot,d<1mm	Pinus_resinosa_Sol._ex_Aiton	Red_pine			1	Conifers	39.9	13.1		47	SoilDepth_0–20	100					39.9	13.1		47
Yes	Independent	HendricksETAL_2000	Non-tropical	Wisconsin,USA	U.W.Arboretum			FineRoot,d<1mm	Picea_glauca_(Moench)_Voss	White_spruce			1	Conifers	40.1598	12.8871		46.953	SoilDepth_0–20	100.1					40.2	12.9		47
Yes	Independent	HendricksETAL_2000	Non-tropical	Wisconsin,USA	U.W.Arboretum			FineRoot,d<1mm	Mixed_species	Mixed_pine			1	Conifers	35.5	11.8		52.7	SoilDepth_0–20	100					35.5	11.8		52.7
Yes	Independent	HendricksETAL_2000	Non-tropical	Wisconsin,USA	U.W.Arboretum			FineRoot,d<1mm	Pinus_strobus_L.	White_pine			1	Conifers	40	13.9698		46.0302	SoilDepth_0–20	99.5					39.8	13.9		45.8
Yes	Independent	HendricksETAL_2000	Non-tropical	Wisconsin,USA	U.W.Arboretum			FineRoot,d<1mm	Betula_papyrifera_Marsh.	Paper_birch			1	Broadleaves	11.3	45.9		42.8	SoilDepth_0–20	100					11.3	45.9		42.8
Yes	Independent	HendricksETAL_2000	Non-tropical	Wisconsin,USA	U.W.Arboretum			FineRoot,d<1mm	Acer_saccharum_Marsh.	Sugar_maple			1	Broadleaves	40.597	10.4478		48.9552	SoilDepth_0–20	100.5					40.8	10.5		49.2
Yes	Independent	HendricksETAL_2000	Non-tropical	Wisconsin,USA	U.W.Arboretum			FineRoot,d<1mm	Quercus_alba_L.	White_oak			1	Broadleaves	42.4575	11.2887		46.2537	SoilDepth_0–20	100.1					42.5	11.3		46.3
Yes	Independent	HendricksETAL_2000	Non-tropical	Wisconsin,USA	U.W.Arboretum			FineRoot,d<1mm	Quercus_rubra_L.	Red_oak			1	Broadleaves	43.5516	13.5913		42.8571	SoilDepth_0–20	100.8					43.9	13.7		43.2
Yes	Independent	HendricksETAL_2000	Non-tropical	Wisconsin,USA	U.W.Arboretum			FineRoot,d<1mm	Quercus_velutina_Lam.	Black_oak			1	Broadleaves	44.1884	9.81964		45.992	SoilDepth_0–20	99.8					44.1	9.8		45.9
Yes	Independent	HendricksETAL_2000	Non-tropical	Wisconsin,USA	Blackhawk_Island			FineRoot,d<1mm	Tsuga_canadensis_(L.)_Carrière	Hemlock			1	Conifers	32.4	15.9		51.7	SoilDepth_0–4.7	100					32.4	15.9		51.7
Yes	Independent	HendricksETAL_2000	Non-tropical	Wisconsin,USA	Blackhawk_Island			FineRoot,d<1mm	Pinus_resinosa_Sol._ex_Aiton	Red_pine			1	Conifers	35.0649	20.7792		44.1558	SoilDepth_0–10	100.1					35.1	20.8		44.2
Yes	Independent	HendricksETAL_2000	Non-tropical	Wisconsin,USA	Blackhawk_Island			FineRoot,d<1mm	Pinus_strobus_L.	White_pine			1	Conifers	34.7652	19.7802		45.4545	SoilDepth_0–2.7	100.1					34.8	19.8		45.5
Yes	Independent	HendricksETAL_2000	Non-tropical	Wisconsin,USA	Blackhawk_Island			FineRoot,d<1mm	Quercus_alba_L.	White_oak			1	Broadleaves	31	17.1		51.9	SoilDepth_0–3.2	100					31	17.1		51.9
Yes	Independent	HendricksETAL_2000	Non-tropical	Wisconsin,USA	Blackhawk_Island			FineRoot,d<1mm	Quercus_alba_L.	White_oak			1	Broadleaves	34.7347	19.9199		45.3453	SoilDepth_3.2–13.2	99.9					34.7	19.9		45.3
Yes	Independent	HendricksETAL_2000	Non-tropical	Wisconsin,USA	Blackhawk_Island			FineRoot,d<1mm	Quercus_rubra_L.	Red_oak			1	Broadleaves	31.7	16.2		52.1	SoilDepth_0–2.7	100					31.7	16.2		52.1
Yes	Independent	HendricksETAL_2000	Non-tropical	Wisconsin,USA	Blackhawk_Island			FineRoot,d<1mm	Quercus_rubra_L.	Red_oak			1	Broadleaves	31.4	20.1		48.5	SoilDepth_2.7–12.7	100					31.4	20.1		48.5
Yes	Independent	HendricksETAL_2000	Non-tropical	Wisconsin,USA	Blackhawk_Island			FineRoot,d<1mm	Quercus_rubra_L.	Red_oak			1	Broadleaves	33.5	17.2		49.3	SoilDepth_0–3.4	100					33.5	17.2		49.3
Yes	Independent	HendricksETAL_2000	Non-tropical	Wisconsin,USA	Blackhawk_Island			FineRoot,d<1mm	Quercus_rubra_L.	Red_oak			1	Broadleaves	35.5	17.9		46.6	SoilDepth_3.4–13.4	100					35.5	17.9		46.6
Yes	Independent	HendricksETAL_2000	Non-tropical	Wisconsin,USA	Blackhawk_Island			FineRoot,d<1mm	Acer_saccharum_Marsh.	Sugar_maple1			1	Broadleaves	39.2	13.8		47	SoilDepth_0–2.8	100					39.2	13.8		47
Yes	Independent	HendricksETAL_2000	Non-tropical	Wisconsin,USA	Blackhawk_Island			FineRoot,d<1mm	Acer_saccharum_Marsh.	Sugar_maple1			1	Broadleaves	38.1	15.1		46.8	SoilDepth_2.8–12.8	100					38.1	15.1		46.8
Yes	Independent	HendricksETAL_2000	Non-tropical	Wisconsin,USA	Blackhawk_Island			FineRoot,d<1mm	Acer_saccharum_Marsh.	Sugar_maple2			1	Broadleaves	36.6	12		51.4	SoilDepth_0–3.3	100					36.6	12		51.4
Yes	Independent	HendricksETAL_2000	Non-tropical	Wisconsin,USA	Blackhawk_Island			FineRoot,d<1mm	Acer_saccharum_Marsh.	Sugar_maple2			1	Broadleaves	34.5	14.2		51.3	SoilDepth_3.3–13.3	100					34.5	14.2		51.3
Yes	Independent	HendricksETAL_2000	Non-tropical	New_York,USA	NewEnglandtransect_Whiteface_Mtn.,_NY			FineRoot,d<1mm	Abies_balsamea_(L.)_Mill.	Balsam_fir			1	Conifers	29.8	21.2		49	SoilDepth_0–Bedrock	100					29.8	21.2		49
Yes	Independent	HendricksETAL_2000	Non-tropical	New_York,USA	NewEnglandtransect_Whiteface_Mtn.,_NY			FineRoot,d<1mm	Picea_rubens_Sarg.	Red_spruce			1	Conifers	28.3	22.9		48.8	SoilDepth_0–Bedrock	100					28.3	22.9		48.8
Yes	Independent	HendricksETAL_2000	Non-tropical	Vermont,USA	NewEnglandtransect_Mt._Mansfield,_VT			FineRoot,d<1mm	Abies_balsamea_(L.)_Mill.	Balsam_fir			1	Conifers	28	20		52	SoilDepth_0–Bedrock	100					28	20		52
Yes	Independent	HendricksETAL_2000	Non-tropical	Vermont,USA	NewEnglandtransect_Mt._Mansfield,_VT			FineRoot,d<1mm	Picea_rubens_Sarg.	Red_spruce			1	Conifers	27.6276	23.3233		49.049	SoilDepth_0–Bedrock	99.9					27.6	23.3		49
Yes	Independent	HendricksETAL_2000	Non-tropical	New_Hampshire,USA	NewEnglandtransect_Mt._Washington,_NH			FineRoot,d<1mm	Abies_balsamea_(L.)_Mill.	Balsam_fir			1	Conifers	29.4	17.9		52.7	SoilDepth_0–Bedrock	100					29.4	17.9		52.7
Yes	Independent	HendricksETAL_2000	Non-tropical	New_Hampshire,USA	NewEnglandtransect_Mt._Washington,_NH			FineRoot,d<1mm	Picea_rubens_Sarg.	Red_spruce			1	Conifers	26.8	21.3		51.9	SoilDepth_0–Bedrock	100					26.8	21.3		51.9
Yes	Independent	HendricksETAL_2000	Non-tropical	Maine,USA	NewEnglandtransect_Mt._DesertIsland,_ME			FineRoot,d<1mm	Abies_balsamea_(L.)_Mill.	Balsam_fir			1	Conifers	26.6201	19.5414		53.8385	SoilDepth_0–Bedrock	100.3					26.7	19.6		54
Yes	Independent	HendricksETAL_2000	Non-tropical	Maine,USA	NewEnglandtransect_Mt._DesertIsland,_ME			FineRoot,d<1mm	Picea_rubens_Sarg.	Red_spruce			1	Conifers	26.5265	19.8198		53.6537	SoilDepth_0–Bedrock	99.9	Lignin_mg/g	Cellulose_mg/g			26.5	19.8		53.6
Yes	Independent	Stump&Binkley_1994	Non-tropical	RockyMountain,USA				Root	Populus_tremuloides_Michx.	Aspen			1	Broadleaves	44.4	33.22		22.38		1000	223.8	444
Yes	Independent	Stump&Binkley_1996	Non-tropical	RockyMountain,USA				Root	Pinus_contorta_Dougl._var._latifolia_Engelm.	Lodgepole_pine			1	Conifers	43.37	35.24		21.39		1000	213.9	433.7
Yes	Independent	Stump&Binkley_1998	Non-tropical	RockyMountain,USA				Root	Picea_engelmannii_Parry_ex_Engelm.	Engelmann_spruce			1	Conifers	38.14	42.64		19.22		1000	192.2	381.4
Yes	Independent	Stump&Binkley_2000	Non-tropical	RockyMountain,USA				Root	Abies_lasiocarpa_(Hook.)_Nutt.	Subalpine_fir			1	Conifers	37.87	42.28		19.85		1000	198.5	378.7
[truncated: 39 more columns]

## Sheet: Info
Source:
Modeling soil organic carbon dynamics in temperate forests with Yasso07
Zhun Mao1,8*, Delphine Derrien1, Markus Didion2, Jari Liski3,9, Thomas Eglin4, Manuel Nicolas5, Mathieu Jonard6, Laurent Saint-André1,7
1 INRA, UR BEF – Biogéochimie des Ecosystèmes Forestiers, 54280 Champenoux, France
2 Swiss Federal Institute for Forest, Snow and Landscape Research WSL, 8903 Birmensdorf, Switzerland
3 Finnish Environment Institute, Ecosystem Change Unit, Natural Environment Centre, Mechelininkatu 34a, P.O.Box 140, 00251 Helsinki, Finland
4 ADEME – DPED – Service Agriculture et Forêts, 49004 Angers, France
5 Office National des Forêts, Direction Forêts et Risques Naturels, Département Recherche-Développement-Innovation, Boulevard de Constance, 77300 Fontainebleau, France
6 Université Catholique de Louvain, Earth and Life Institute, Croix du Sud 2, L7.05.09, 1348 Louvain-la-Neuve, Belgium
7 CIRAD, UMR ECO&Sols, place Viala, 34398 Montpellier Cedex 5, France
8 Amap, Inra, Cnrs, Ird, Cirad, University Montpellier, Montpellier, France
9 Finnish Meteorological Institute, P.O. Box 503, 00101 Helsinki, Finland
*Corresponding author: Zhun Mao; email address: maozhun04@126.com.
