# Supplementary material for: Modeling soil organic carbon dynamics in temperate forests with Yasso07
Source: Copernicus journal article supplement (doi:10.5194/bg-16-1955-2019), 2019-05-13
Supplement: Supplementary file [file bg-16-1955-2019-supplement-title-page.pdf › bg-16-1955-2019-supplement-title-page.pdf]

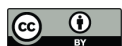

## *Supplement of*

# **Modeling soil organic carbon dynamics in temperate forests with Yasso07**

**Zhun Mao et al.**

*Correspondence to:* Zhun Mao (maozhun04@126.com)

- bg-16-1955-2019-supplement-title-page.pdf
- 20190420\_MaoETAL\_Yasso07\_SupplementaryMaterial-II\_Database for the meta-analysis of wood and litter chemical composition.xlsx
- 20190420\_MaoETAL\_Yasso07\_SupplementaryMaterial\_withoutTraces.docx

The copyright of individual parts of the supplement might differ from the CC BY 4.0 License.
